# Supplementary material
Source: PubMed Central journal article supplement (PMC8423347)
Supplement: NIHMS1728858-supplement-1728858_Sup_fig3.pdf [file NIHMS1728858-supplement-1728858_Sup_fig3.pdf]

| Category        | Term                                                                             |
|-----------------|----------------------------------------------------------------------------------|
| UP_KEYWORDS     | Phosphoprotein                                                                   |
| GOTERM_CC_DIREC | GO:0005634~nucleus                                                               |
| UP_KEYWORDS     | Nucleus                                                                          |
| UP_KEYWORDS     | Cytoplasm                                                                        |
| GOTERM_CC_DIREC | GO:0005737~cytoplasm                                                             |
| UP_KEYWORDS     | Acetylation                                                                      |
| UP_KEYWORDS     | Alternative splicing                                                             |
| UP_KEYWORDS     | Meiosis                                                                          |
| UP_KEYWORDS     | Spermatogenesis                                                                  |
| GOTERM_BP_DIREC | GO:0051321~meiotic cell cycle                                                    |
| UP_KEYWORDS     | Zinc                                                                             |
| GOTERM_MF_DIREC | GO:0005515~protein binding                                                       |
| GOTERM_BP_DIREC | GO:1904871~positive regulation of protein localization to Cajal body             |
| GOTERM_BP_DIREC | GO:0007283~spermatogenesis                                                       |
| GOTERM_MF_DIREC | GO:0008270~zinc ion binding                                                      |
| GOTERM_CC_DIREC | GO:0005832~chaperonin-containing T-complex                                       |
| GOTERM_CC_DIREC | GO:0005654~nucleoplasm                                                           |
| GOTERM_CC_DIREC | GO:0000795~synaptonemal complex                                                  |
| INTERPRO        | IPR027410:TCP-1-like chaperonin intermediate domain                              |
| INTERPRO        | IPR002194:Chaperonin TCP-1, conserved site                                       |
| GOTERM_BP_DIREC | GO:0007286~spermatid development                                                 |
| UP_SEQ_FEATURE  | splice variant                                                                   |
| UP_KEYWORDS     | Transcription regulation                                                         |
| INTERPRO        | IPR017998:Chaperone tailless complex polypeptide 1 (TCP-1)                       |
| UP_KEYWORDS     | Transcription                                                                    |
| GOTERM_CC_DIREC | GO:0005829~cytosol                                                               |
| UP_KEYWORDS     | Zinc-finger                                                                      |
| GOTERM_CC_DIREC | GO:0002199~zona pellucida receptor complex                                       |
| UP_KEYWORDS     | Ligase                                                                           |
| INTERPRO        | IPR027409:GroEL-like apical domain                                               |
| INTERPRO        | IPR027413:GroEL-like equatorial domain                                           |
| GOTERM_BP_DIREC | GO:1904851~positive regulation of establishment of protein localization to telom |
| INTERPRO        | IPR002423:Chaperonin Cpn60/TCP-1                                                 |
| UP_KEYWORDS     | Metal-binding                                                                    |
| GOTERM_BP_DIREC | GO:0006457~protein folding                                                       |
| UP_KEYWORDS     | Chromatin regulator                                                              |
| GOTERM_BP_DIREC | GO:1904874~positive regulation of telomerase RNA localization to Cajal body      |
| UP_KEYWORDS     | Cell cycle                                                                       |
| UP_KEYWORDS     | Coiled coil                                                                      |
| GOTERM_BP_DIREC | GO:0006351~transcription, DNA-templated                                          |
| UP_KEYWORDS     | Ubl conjugation pathway                                                          |
| GOTERM_MF_DIREC | GO:0016874~ligase activity                                                       |

UP\_KEYWORDS      **Differentiation**  
GOTERM\_BP\_DIREC GO:0032212~positive regulation of telomere maintenance via telomerase  
GOTERM\_CC\_DIREC GO:0005874~**microtubule**  
GOTERM\_BP\_DIREC GO:0016569~**covalent chromatin modification**  
GOTERM\_BP\_DIREC GO:0007049~**cell cycle**  
GOTERM\_MF\_DIREC GO:0046872~metal ion binding  
GOTERM\_MF\_DIREC GO:0061630~ubiquitin protein ligase activity  
UP\_KEYWORDS      Oxidoreductase  
GOTERM\_BP\_DIREC GO:1901998~toxin transport  
GOTERM\_BP\_DIREC GO:0000209~protein polyubiquitination  
GOTERM\_MF\_DIREC GO:0016491~oxidoreductase activity  
KEGG\_PATHWAY      mmu01130:Biosynthesis of antibiotics  
GOTERM\_MF\_DIREC GO:0003824~catalytic activity  
GOTERM\_BP\_DIREC GO:0006355~**regulation of transcription, DNA-templated**  
GOTERM\_MF\_DIREC GO:0004842~ubiquitin-protein transferase activity  
GOTERM\_BP\_DIREC GO:0007130~synaptonemal complex assembly  
GOTERM\_BP\_DIREC GO:0007129~**synapsis**  
GOTERM\_CC\_DIREC GO:0044297~cell body  
GOTERM\_BP\_DIREC GO:0006974~cellular response to DNA damage stimulus  
GOTERM\_MF\_DIREC GO:0051082~unfolded protein binding  
GOTERM\_BP\_DIREC GO:0050821~protein stabilization  
GOTERM\_BP\_DIREC GO:0030154~**cell differentiation**  
GOTERM\_BP\_DIREC GO:0008152~metabolic process  
UP\_KEYWORDS      Chaperone  
GOTERM\_CC\_DIREC GO:0000794~**condensed nuclear chromosome**  
GOTERM\_BP\_DIREC GO:0055114~oxidation-reduction process  
UP\_KEYWORDS      DNA damage  
GOTERM\_CC\_DIREC GO:0005730~nucleolus  
GOTERM\_BP\_DIREC GO:0007126~**meiotic nuclear division**  
UP\_KEYWORDS      **DNA-binding**  
UP\_KEYWORDS      LIM domain  
GOTERM\_MF\_DIREC GO:0000166~nucleotide binding  
INTERPRO          IPR013083:Zinc finger, RING/FYVE/PHD-type  
UP\_KEYWORDS      Aminoacyl-tRNA synthetase  
INTERPRO          IPR006888:Cor1/Xlr/Xmr family  
INTERPRO          IPR001781:Zinc finger, LIM-type  
GOTERM\_CC\_DIREC GO:0043209~myelin sheath  
GOTERM\_BP\_DIREC GO:0007339~binding of sperm to zona pellucida  
INTERPRO          IPR001841:Zinc finger, RING-type  
SMART              SM00132:LIM  
UP\_KEYWORDS      DNA repair  
UP\_KEYWORDS      **Ubl conjugation**  
GOTERM\_BP\_DIREC GO:0007140~male meiosis

GOTERM\_CC\_DIREC GO:0005813~centrosome  
GOTERM\_MF\_DIREC GO:0004812~aminoacyl-tRNA ligase activity  
UP\_KEYWORDS Flavoprotein  
GOTERM\_MF\_DIREC GO:0003730~mRNA 3'-UTR binding  
INTERPRO IPR013785:Aldolase-type TIM barrel  
GOTERM\_BP\_DIREC GO:0016567~protein ubiquitination  
UP\_KEYWORDS **Nucleotide-binding**  
UP\_KEYWORDS RNA-binding  
GOTERM\_BP\_DIREC GO:0045736~negative regulation of cyclin-dependent protein serine/threonine ki  
GOTERM\_CC\_DIREC GO:0005739~mitochondrion  
UP\_KEYWORDS **ATP-binding**  
GOTERM\_BP\_DIREC GO:0006635~fatty acid beta-oxidation  
GOTERM\_MF\_DIREC **GO:0003682~chromatin binding**  
GOTERM\_MF\_DIREC GO:0016208~AMP binding  
GOTERM\_CC\_DIREC GO:0000801~central element  
UP\_SEQ\_FEATURE zinc finger region:RING-type  
UP\_KEYWORDS NADP  
GOTERM\_BP\_DIREC GO:0048477~oogenesis  
UP\_KEYWORDS **Repressor**  
GOTERM\_MF\_DIREC GO:0003723~RNA binding  
GOTERM\_CC\_DIREC GO:0005913~cell-cell adherens junction  
UP\_KEYWORDS Cell division  
UP\_KEYWORDS Lyase  
GOTERM\_BP\_DIREC GO:0006418~tRNA aminoacylation for protein translation  
UP\_KEYWORDS Oogenesis  
GOTERM\_BP\_DIREC **GO:0009566~fertilization**  
GOTERM\_BP\_DIREC GO:0051026~chiasma assembly  
UP\_KEYWORDS mRNA splicing  
KEGG\_PATHWAY mmu00640:Propanoate metabolism  
GOTERM\_MF\_DIREC GO:0016829~lyase activity  
KEGG\_PATHWAY mmu00310:Lysine degradation  
GOTERM\_MF\_DIREC GO:0098641~cadherin binding involved in cell-cell adhesion  
KEGG\_PATHWAY mmu00970:Aminoacyl-tRNA biosynthesis  
GOTERM\_CC\_DIREC **GO:0000800~lateral element**  
GOTERM\_CC\_DIREC GO:0005694~chromosome  
INTERPRO IPR016040:NAD(P)-binding domain  
GOTERM\_BP\_DIREC **GO:0000122~negative regulation of transcription from RNA polymerase II prom**  
UP\_KEYWORDS **Microtubule**  
UP\_KEYWORDS FAD  
GOTERM\_CC\_DIREC GO:0005765~lysosomal membrane  
GOTERM\_BP\_DIREC GO:0006281~DNA repair  
GOTERM\_BP\_DIREC GO:0051865~protein autoubiquitination  
GOTERM\_MF\_DIREC GO:0031625~ubiquitin protein ligase binding

UP\_SEQ\_FEATURE domain:LIM zinc-binding 1  
UP\_SEQ\_FEATURE domain:LIM zinc-binding 2  
GOTERM\_BP\_DIREC GO:0007131~reciprocal meiotic recombination  
UP\_SEQ\_FEATURE short sequence motif:"HIGH" region  
SMART SM00184:RING  
GOTERM\_BP\_DIREC GO:0007141~male meiosis I  
GOTERM\_CC\_DIREC GO:0005759~mitochondrial matrix  
GOTERM\_BP\_DIREC GO:0043161~proteasome-mediated ubiquitin-dependent protein catabolic process  
UP\_KEYWORDS Endosome  
UP\_KEYWORDS Cytoskeleton  
UP\_KEYWORDS Iron-sulfur  
GOTERM\_MF\_DIREC GO:0003677~DNA binding  
UP\_KEYWORDS Protein transport  
GOTERM\_BP\_DIREC GO:0008380~RNA splicing  
UP\_KEYWORDS Mitochondrion  
GOTERM\_CC\_DIREC GO:0001741~XY body  
GOTERM\_BP\_DIREC GO:0051301~cell division  
UP\_KEYWORDS DNA replication  
GOTERM\_BP\_DIREC GO:0045893~positive regulation of transcription, DNA-templated  
GOTERM\_BP\_DIREC GO:0015937~coenzyme A biosynthetic process  
INTERPRO IPR017907:Zinc finger, RING-type, conserved site  
GOTERM\_MF\_DIREC GO:0003985~acetyl-CoA C-acetyltransferase activity  
UP\_KEYWORDS mRNA processing  
GOTERM\_BP\_DIREC GO:0000711~meiotic DNA repair synthesis  
GOTERM\_BP\_DIREC GO:0090666~scaRNA localization to Cajal body  
INTERPRO IPR023753:Pyridine nucleotide-disulphide oxidoreductase, FAD/NAD(P)-binding  
UP\_KEYWORDS Isopeptide bond  
GOTERM\_MF\_DIREC GO:0003676~nucleic acid binding  
GOTERM\_MF\_DIREC GO:0030332~cyclin binding  
UP\_SEQ\_FEATURE domain:KH 2  
UP\_SEQ\_FEATURE domain:KH 1  
INTERPRO IPR012677:Nucleotide-binding, alpha-beta plait  
UP\_KEYWORDS RNA-mediated gene silencing  
GOTERM\_MF\_DIREC GO:0004861~cyclin-dependent protein serine/threonine kinase inhibitor activity  
KEGG\_PATHWAY mmu00071:Fatty acid degradation  
GOTERM\_CC\_DIREC GO:0005768~endosome  
GOTERM\_MF\_DIREC GO:0044822~poly(A) RNA binding  
INTERPRO IPR008927:6-phosphogluconate dehydrogenase, C-terminal-like  
INTERPRO IPR009080:Aminoacyl-tRNA synthetase, class 1a, anticodon-binding  
GOTERM\_BP\_DIREC GO:0048812~neuron projection morphogenesis  
GOTERM\_BP\_DIREC GO:0006302~double-strand break repair  
UP\_KEYWORDS Transit peptide  
GOTERM\_CC\_DIREC GO:0030665~clathrin-coated vesicle membrane

GOTERM\_CC\_DIREC GO:0030897~HOPS complex  
GOTERM\_CC\_DIREC GO:0070062~extracellular exosome  
KEGG\_PATHWAY mmu01212:Fatty acid metabolism  
GOTERM\_MF\_DIREC GO:0051536~iron-sulfur cluster binding  
UP\_KEYWORDS WD repeat  
GOTERM\_MF\_DIREC GO:0070403~NAD+ binding  
GOTERM\_BP\_DIREC GO:0045786~negative regulation of cell cycle  
INTERPRO IPR004087:K Homology domain  
GOTERM\_CC\_DIREC GO:0016023~cytoplasmic, membrane-bounded vesicle  
GOTERM\_CC\_DIREC GO:0031965~nuclear membrane  
GOTERM\_CC\_DIREC GO:0055037~recycling endosome  
UP\_KEYWORDS **Developmental protein**  
GOTERM\_BP\_DIREC GO:0042138~meiotic DNA double-strand break formation  
GOTERM\_CC\_DIREC **GO:0000790~nuclear chromatin**  
GOTERM\_BP\_DIREC GO:0007050~cell cycle arrest  
GOTERM\_BP\_DIREC GO:0000902~cell morphogenesis  
GOTERM\_CC\_DIREC GO:0031410~cytoplasmic vesicle  
KEGG\_PATHWAY mmu00620:Pyruvate metabolism  
SMART SM00322:KH  
UP\_SEQ\_FEATURE chain:X-linked lymphocyte-regulated protein 3C  
UP\_SEQ\_FEATURE chain:X-linked lymphocyte-regulated protein 3B  
UP\_SEQ\_FEATURE chain:X-linked lymphocyte-regulated protein 3A  
GOTERM\_BP\_DIREC GO:0031146~SCF-dependent proteasomal ubiquitin-dependent protein catabolic  
GOTERM\_MF\_DIREC GO:0003697~single-stranded DNA binding  
GOTERM\_BP\_DIREC GO:0046685~response to arsenic-containing substance  
GOTERM\_BP\_DIREC GO:0016973~poly(A)+ mRNA export from nucleus  
GOTERM\_MF\_DIREC **GO:0008134~transcription factor binding**  
UP\_KEYWORDS **Methylation**  
GOTERM\_MF\_DIREC GO:0008013~beta-catenin binding  
GOTERM\_BP\_DIREC GO:0031047~gene silencing by RNA  
SMART SM00360:RRM  
UP\_KEYWORDS Hydrolase  
GOTERM\_MF\_DIREC **GO:0005524~ATP binding**  
KEGG\_PATHWAY mmu05215:Prostate cancer  
INTERPRO IPR019775:WD40 repeat, conserved site  
GOTERM\_CC\_DIREC GO:0010008~endosome membrane  
GOTERM\_BP\_DIREC GO:0015031~protein transport  
KEGG\_PATHWAY mmu05219:Bladder cancer  
KEGG\_PATHWAY mmu04144:Endocytosis  
GOTERM\_BP\_DIREC GO:0097352~autophagosome maturation  
GOTERM\_MF\_DIREC GO:0016787~hydrolase activity  
INTERPRO IPR000504:RNA recognition motif domain  
GOTERM\_BP\_DIREC GO:0030097~hemopoiesis

UP\_KEYWORDS **Activator**  
INTERPRO IPR020472:G-protein beta WD-40 repeat  
INTERPRO IPR001680:WD40 repeat  
GOTERM\_MF\_DIREC **GO:0019901~protein kinase binding**  
GOTERM\_BP\_DIREC GO:0006417~regulation of translation  
UP\_SEQ\_FEATURE short sequence motif:"KMSKS" region  
KEGG\_PATHWAY mmu01100:Metabolic pathways  
GOTERM\_MF\_DIREC GO:0050660~flavin adenine dinucleotide binding  
PIR\_SUPERFAMILY PIRSF000429:acetyl-CoA acetyltransferase  
GOTERM\_BP\_DIREC GO:0051973~positive regulation of telomerase activity  
UP\_SEQ\_FEATURE **zinc finger region:C2H2-type 6**  
GOTERM\_MF\_DIREC GO:0003712~transcription cofactor activity  
UP\_SEQ\_FEATURE repeat:WD 3  
GOTERM\_BP\_DIREC **GO:0045944~positive regulation of transcription from RNA polymerase II promo**  
INTERPRO IPR014729:Rossmann-like alpha/beta/alpha sandwich fold  
GOTERM\_BP\_DIREC GO:0006260~DNA replication  
GOTERM\_MF\_DIREC GO:0042393~histone binding  
KEGG\_PATHWAY mmu04931:Insulin resistance  
GOTERM\_BP\_DIREC GO:0010212~response to ionizing radiation  
KEGG\_PATHWAY mmu00030:Pentose phosphate pathway  
INTERPRO IPR002155:Thiolase  
INTERPRO IPR020610:Thiolase, active site  
INTERPRO IPR003000:Sirtuin family  
INTERPRO IPR026590:Sirtuin family, catalytic core domain  
GOTERM\_BP\_DIREC GO:0034587~piRNA metabolic process  
GOTERM\_BP\_DIREC GO:0043407~negative regulation of MAP kinase activity  
GOTERM\_CC\_DIREC GO:0005667~transcription factor complex  
UP\_SEQ\_FEATURE repeat:WD 2  
UP\_SEQ\_FEATURE repeat:WD 1  
INTERPRO IPR019956:Ubiquitin subgroup  
GOTERM\_MF\_DIREC GO:0097371~MDM2/MDM4 family protein binding  
SMART SM00320:WD40  
UP\_SEQ\_FEATURE repeat:WD 4  
GOTERM\_CC\_DIREC GO:0080008~Cul4-RING E3 ubiquitin ligase complex  
GOTERM\_BP\_DIREC GO:0045732~positive regulation of protein catabolic process  
GOTERM\_CC\_DIREC GO:0005856~cytoskeleton  
UP\_KEYWORDS Translation regulation  
INTERPRO IPR004088:K Homology domain, type 1  
UP\_SEQ\_FEATURE domain:Deacetylase sirtuin-type  
GOTERM\_BP\_DIREC GO:0006397~mRNA processing  
UP\_KEYWORDS Lipid metabolism  
UP\_SEQ\_FEATURE **zinc finger region:C2H2-type 10**  
GOTERM\_BP\_DIREC GO:0043046~DNA methylation involved in gamete generation

KEGG\_PATHWAY mmu00380:Tryptophan metabolism  
KEGG\_PATHWAY mmu01200:Carbon metabolism  
INTERPRO IPR020613:Thiolase, conserved site  
INTERPRO IPR020617:Thiolase, C-terminal  
INTERPRO IPR020616:Thiolase, N-terminal  
INTERPRO IPR003530:Long hematopoietin receptor, soluble alpha chain, conserved site  
UP\_SEQ\_FEATURE nucleotide phosphate-binding region:FAD  
UP\_KEYWORDS Cytoplasmic vesicle  
GOTERM\_CC\_DIREC GO:0000242~pericentriolar material  
UP\_SEQ\_FEATURE zinc finger region:C2H2-type 11  
UP\_KEYWORDS NAD  
GOTERM\_CC\_DIREC GO:0035861~site of double-strand break  
KEGG\_PATHWAY mmu05212:Pancreatic cancer  
KEGG\_PATHWAY mmu05214:Glioma  
GOTERM\_BP\_DIREC GO:0035855~megakaryocyte development  
GOTERM\_BP\_DIREC GO:0046512~sphingosine biosynthetic process  
GOTERM\_BP\_DIREC GO:0090244~Wnt signaling pathway involved in somitogenesis  
GOTERM\_BP\_DIREC GO:0050687~negative regulation of defense response to virus  
GOTERM\_BP\_DIREC GO:0048642~negative regulation of skeletal muscle tissue development  
GOTERM\_BP\_DIREC GO:0002318~myeloid progenitor cell differentiation  
GOTERM\_BP\_DIREC GO:0021978~telencephalon regionalization  
GOTERM\_BP\_DIREC GO:0031062~positive regulation of histone methylation  
GOTERM\_CC\_DIREC GO:0005929~cilium  
GOTERM\_CC\_DIREC GO:0031201~SNARE complex  
UP\_KEYWORDS Golgi apparatus  
UP\_KEYWORDS Lysosome  
GOTERM\_CC\_DIREC GO:0042470~melanosome  
GOTERM\_BP\_DIREC GO:0042787~protein ubiquitination involved in ubiquitin-dependent protein catal  
GOTERM\_BP\_DIREC GO:0070936~protein K48-linked ubiquitination  
UP\_SEQ\_FEATURE zinc finger region:C2H2-type 7  
GOTERM\_CC\_DIREC GO:0043234~protein complex  
GOTERM\_BP\_DIREC GO:0007005~mitochondrion organization  
GOTERM\_BP\_DIREC **GO:0007275~multicellular organism development**  
SMART SM00055:FCH  
KEGG\_PATHWAY mmu04115:p53 signaling pathway  
GOTERM\_MF\_DIREC GO:0050750~low-density lipoprotein particle receptor binding  
GOTERM\_BP\_DIREC GO:0006511~ubiquitin-dependent protein catabolic process  
UP\_KEYWORDS Protein biosynthesis  
INTERPRO IPR003008:Tubulin/FtsZ, GTPase domain  
INTERPRO IPR001060:FCH domain  
GOTERM\_BP\_DIREC GO:0009953~dorsal/ventral pattern formation  
GOTERM\_BP\_DIREC GO:0016192~vesicle-mediated transport  
GOTERM\_CC\_DIREC **GO:0001673~male germ cell nucleus**

UP\_KEYWORDS Chromosome  
INTERPRO IPR008984:SMAD/FHA domain  
UP\_SEQ\_FEATURE zinc finger region:C2H2-type 1  
GOTERM\_CC\_DIREC GO:0005793~endoplasmic reticulum-Golgi intermediate compartment  
GOTERM\_BP\_DIREC GO:0032088~negative regulation of NF-kappaB transcription factor activity  
GOTERM\_MF\_DIREC GO:0035612~AP-2 adaptor complex binding  
GOTERM\_MF\_DIREC GO:0019887~protein kinase regulator activity  
GOTERM\_BP\_DIREC GO:0001890~placenta development  
GOTERM\_BP\_DIREC GO:0090181~regulation of cholesterol metabolic process  
GOTERM\_BP\_DIREC GO:0051123~RNA polymerase II transcriptional preinitiation complex assembly  
KEGG\_PATHWAY mmu05213:Endometrial cancer  
GOTERM\_BP\_DIREC GO:0043153~entrainment of circadian clock by photoperiod  
GOTERM\_BP\_DIREC GO:0043393~regulation of protein binding  
INTERPRO IPR000253:Forkhead-associated (FHA) domain  
GOTERM\_CC\_DIREC GO:0005669~transcription factor TFIID complex

| -LOG10(pval) | PValue   |
|--------------|----------|
| 24.98        | 1.04E-25 |
| 19.54        | 2.91E-20 |
| 17.10        | 7.97E-18 |
| 16.99        | 1.02E-17 |
| 15.11        | 7.84E-16 |
| 14.88        | 1.33E-15 |
| 13.58        | 2.60E-14 |
| 12.08        | 8.29E-13 |
| 11.04        | 9.02E-12 |
| 10.88        | 1.31E-11 |
| 9.35         | 4.45E-10 |
| 9.09         | 8.13E-10 |
| 8.95         | 1.12E-09 |
| 8.84         | 1.46E-09 |
| 8.70         | 1.99E-09 |
| 8.41         | 3.92E-09 |
| 8.29         | 5.07E-09 |
| 8.00         | 1.00E-08 |
| 7.95         | 1.11E-08 |
| 7.95         | 1.11E-08 |
| 7.74         | 1.84E-08 |
| 7.72         | 1.91E-08 |
| 7.66         | 2.20E-08 |
| 7.53         | 2.96E-08 |
| 7.43         | 3.70E-08 |
| 7.28         | 5.22E-08 |
| 7.09         | 8.19E-08 |
| 6.79         | 1.63E-07 |
| 6.78         | 1.66E-07 |
| 6.56         | 2.78E-07 |
| 6.56         | 2.78E-07 |
| 6.55         | 2.82E-07 |
| 6.30         | 5.05E-07 |
| 6.23         | 5.85E-07 |
| 6.18         | 6.55E-07 |
| 6.17         | 6.83E-07 |
| 6.15         | 7.09E-07 |
| 5.99         | 1.03E-06 |
| 5.92         | 1.20E-06 |
| 5.91         | 1.23E-06 |
| 5.90         | 1.26E-06 |
| 5.62         | 2.41E-06 |

|      |          |
|------|----------|
| 5.61 | 2.45E-06 |
| 5.56 | 2.75E-06 |
| 5.47 | 3.42E-06 |
| 5.14 | 7.26E-06 |
| 4.93 | 1.17E-05 |
| 4.54 | 2.90E-05 |
| 4.43 | 3.75E-05 |
| 4.39 | 4.10E-05 |
| 4.29 | 5.19E-05 |
| 4.28 | 5.25E-05 |
| 4.22 | 6.02E-05 |
| 4.22 | 6.07E-05 |
| 4.15 | 7.04E-05 |
| 4.15 | 7.04E-05 |
| 4.04 | 9.06E-05 |
| 3.92 | 1.21E-04 |
| 3.87 | 1.34E-04 |
| 3.86 | 1.37E-04 |
| 3.84 | 1.43E-04 |
| 3.81 | 1.55E-04 |
| 3.79 | 1.61E-04 |
| 3.79 | 1.62E-04 |
| 3.71 | 1.95E-04 |
| 3.66 | 2.20E-04 |
| 3.64 | 2.30E-04 |
| 3.62 | 2.39E-04 |
| 3.58 | 2.65E-04 |
| 3.57 | 2.67E-04 |
| 3.57 | 2.71E-04 |
| 3.54 | 2.87E-04 |
| 3.48 | 3.33E-04 |
| 3.48 | 3.34E-04 |
| 3.44 | 3.66E-04 |
| 3.42 | 3.84E-04 |
| 3.40 | 4.01E-04 |
| 3.37 | 4.29E-04 |
| 3.37 | 4.29E-04 |
| 3.35 | 4.46E-04 |
| 3.28 | 5.26E-04 |
| 3.24 | 5.77E-04 |
| 3.23 | 5.87E-04 |
| 3.20 | 6.35E-04 |
| 3.18 | 6.64E-04 |

|      |             |
|------|-------------|
| 3.16 | 6.96E-04    |
| 3.15 | 7.10E-04    |
| 3.04 | 9.16E-04    |
| 3.00 | 9.97E-04    |
| 2.93 | 0.001165242 |
| 2.91 | 0.001222876 |
| 2.91 | 0.001233125 |
| 2.88 | 0.001322832 |
| 2.85 | 0.001423906 |
| 2.85 | 0.001425731 |
| 2.84 | 0.001439929 |
| 2.81 | 0.0015574   |
| 2.79 | 0.00160829  |
| 2.77 | 0.001711703 |
| 2.76 | 0.001737624 |
| 2.74 | 0.001806286 |
| 2.73 | 0.001866181 |
| 2.71 | 0.001938443 |
| 2.65 | 0.002214825 |
| 2.65 | 0.00223682  |
| 2.60 | 0.002483144 |
| 2.60 | 0.002495358 |
| 2.58 | 0.002620265 |
| 2.58 | 0.002625933 |
| 2.55 | 0.002819478 |
| 2.53 | 0.002945119 |
| 2.53 | 0.002958282 |
| 2.51 | 0.003076805 |
| 2.50 | 0.003134374 |
| 2.49 | 0.003239795 |
| 2.48 | 0.003321793 |
| 2.48 | 0.003324238 |
| 2.47 | 0.003383735 |
| 2.47 | 0.003391948 |
| 2.46 | 0.00349669  |
| 2.45 | 0.00352374  |
| 2.45 | 0.003526887 |
| 2.42 | 0.003776609 |
| 2.42 | 0.003826135 |
| 2.41 | 0.003933688 |
| 2.40 | 0.004001084 |
| 2.38 | 0.004143054 |
| 2.38 | 0.004146227 |

2.38 0.004177987  
2.38 0.004177987  
2.36 0.004370449  
2.35 0.004425702  
2.32 0.004816993  
2.24 0.005817138  
2.23 0.005878797  
2.21 0.006196351  
2.20 0.006324434  
2.19 0.006454683  
2.19 0.006463934  
2.17 0.006794517  
2.15 0.007052498  
2.13 0.007389135  
2.13 0.007487762  
2.12 0.007555865  
2.12 0.007575707  
2.12 0.007666214  
2.11 0.00780388  
2.10 0.007976408  
2.07 0.008609318  
2.06 0.008736955  
2.06 0.008774766  
2.05 0.008859327  
2.05 0.008859327  
2.04 0.009122101  
2.02 0.009500395  
2.02 0.009539144  
2.01 0.009753666  
2.01 0.009767621  
2.01 0.009767621  
2.00 0.010052538  
1.99 0.010118832  
1.99 0.010126381  
1.99 0.010221128  
1.98 0.01056832  
1.96 0.011016829  
1.94 0.011365699  
1.94 0.011365699  
1.93 0.011820857  
1.93 0.011820857  
1.93 0.01185323  
1.92 0.011958763

1.92 0.011958763  
1.92 0.012017406  
1.91 0.012358764  
1.91 0.012373205  
1.90 0.012706394  
1.89 0.012785839  
1.89 0.012944185  
1.88 0.013236595  
1.88 0.013316133  
1.87 0.013413737  
1.87 0.013527783  
1.85 0.01414431  
1.84 0.014380483  
1.84 0.014455737  
1.84 0.014506014  
1.84 0.014506014  
1.81 0.015313462  
1.81 0.015425361  
1.81 0.015523244  
1.81 0.015597806  
1.81 0.015597806  
1.81 0.015597806  
1.80 0.015750068  
1.80 0.015981008  
1.79 0.016111785  
1.79 0.016111785  
1.79 0.016128779  
1.79 0.016269378  
1.77 0.017077814  
1.75 0.017622787  
1.75 0.01795926  
1.74 0.018379035  
1.73 0.01845088  
1.73 0.018499358  
1.73 0.018501768  
1.73 0.018686304  
1.73 0.018689368  
1.72 0.018882267  
1.72 0.01914578  
1.71 0.019559106  
1.70 0.019956233  
1.70 0.020073658  
1.69 0.020194375

1.69 0.020405066  
1.68 0.020986368  
1.68 0.021106784  
1.67 0.021545825  
1.67 0.021570033  
1.66 0.021871185  
1.65 0.022421625  
1.65 0.02249181  
1.64 0.022879628  
1.63 0.023234479  
1.63 0.023432192  
1.63 0.023683998  
1.62 0.023761645  
1.62 0.02383603  
1.62 0.02385583  
1.62 0.023867898  
1.62 0.024011429  
1.62 0.024039571  
1.61 0.024430741  
1.59 0.025880899  
1.58 0.026062671  
1.58 0.026062671  
1.58 0.026062671  
1.58 0.026062671  
1.58 0.026134027  
1.58 0.026410762  
1.56 0.02779221  
1.55 0.027899397  
1.55 0.027899397  
1.55 0.028223953  
1.55 0.028272646  
1.55 0.028407052  
1.54 0.028951306  
1.53 0.02961998  
1.51 0.030556989  
1.51 0.030572189  
1.51 0.030761549  
1.51 0.030767995  
1.51 0.031006899  
1.51 0.031042787  
1.51 0.031185625  
1.49 0.032022892  
1.49 0.03214278

1.49 0.032176864  
1.49 0.032464258  
1.47 0.033896686  
1.47 0.033896686  
1.47 0.033896686  
1.47 0.033896686  
1.47 0.033958106  
1.47 0.03403281  
1.47 0.034198976  
1.46 0.034581509  
1.45 0.035526026  
1.44 0.036064651  
1.44 0.036558592  
1.44 0.036558592  
1.43 0.037078838  
1.43 0.037216944  
1.43 0.037216944  
1.43 0.037216944  
1.43 0.037216944  
1.43 0.037216944  
1.43 0.037216944  
1.43 0.037216944  
1.43 0.037216944  
1.42 0.038374315  
1.41 0.038546577  
1.41 0.038970979  
1.41 0.039164026  
1.40 0.039727178  
1.40 0.03972881  
1.40 0.040073911  
1.39 0.040603553  
1.39 0.040704964  
1.39 0.040755953  
1.39 0.041198057  
1.38 0.041375364  
1.38 0.041506618  
1.38 0.041626051  
1.38 0.041952029  
1.37 0.042263467  
1.37 0.042355144  
1.37 0.042355144  
1.36 0.043236221  
1.36 0.043539017  
1.35 0.044382482

1.35 0.044578962  
1.35 0.044836054  
1.34 0.045234425  
1.34 0.045366499  
1.34 0.045622845  
1.34 0.046019034  
1.34 0.046019034  
1.33 0.046544241  
1.33 0.046619541  
1.33 0.046619541  
1.33 0.046840264  
1.32 0.048035125  
1.32 0.048035125  
1.31 0.048868518  
1.30 0.049975469

## Genes

ALS2, LDHA, RUSC1, XRCC6, PGD, VPS52, VPS53, WTAP, CIAPIN1, CUL3, HMHA1, PGAM5  
ALS2, MEF2B, TEX19.2, LDHA, RUSC1, XRCC6, PGD, CHMP7, ASCC1, WTAP, CIAPIN1, SOHLH2, MEF2B, RUSC1, XRCC6, CHMP7, ASCC1, WTAP, CIAPIN1, SOHLH2, TAF7L, NONO, DCPS, RBPMS2, TEX19.2, LDHA, DZIP3, RUSC1, CHMP7, PGD, RAB1B, CCT2, CCT3, CIAPIN1, TAF7L, ALS2, RBPMS2, TEX19.2, LDHA, DZIP3, RUSC1, XRCC6, PGD, NELL2, CHMP7, RAB1B, CCT2, PDP1, RBPMS2, ALS2, LDHA, PGD, XRCC6, VPS52, VPS53, RAB1B, CCT2, CCT3, VPS33B, WTAP, ALS2, MEF2B, DZIP3, RUSC1, CHMP7, VPS52, VPS53, WTAP, TAF7L, BC026585, NONO, HMHA1, CCNB1IP1, TEX19.2, NBN, FKBP6, MAEL, SYCE1, MOV10L1, SYCP2, SYCP1, SIRT2, CDK2, TEX19.2, RNF17, NKD1, FKBP6, NANOS2, ADAD1, SPINK2, MAEL, MOV10L1, SOHLH2, TAF7L, CCNB1IP1, TEX19.2, NBN, FKBP6, MAEL, SYCE1, MOV10L1, SYCP2, SYCP1, SIRT2, CDK2, LMO1, DZIP3, THRB, LMO4, RBM4, RBM5, ZFP583, TRIM47, HMHA1, ZFP90, GATA3, GIT2, TEX101, ALS2, TEX19.2, XRCC6, CCT3, WTAP, TAF7L, NONO, CUL3, MEI4, INSIG2, DNAJB1, CCT7, CCT5, TCP1, CCT4, CCT8, CCT2, CCT6A, CCT3  
TEX19.2, NKD1, RNF17, FKBP6, NEK1, NANOS2, ARID4B, ADAD1, SPINK2, MAEL, MLH1, MRE11A, ZMAT1, PPARA, ZBTB32, ZFP385A, AEBP1, LMO1, DZIP3, THRB, AGTPBP1, LMO4, RBM4, CCT7, CCT5, TCP1, CCT4, CCT8, CCT2, CCT6A, CCT3  
XRCC6, RBM4, MAEL, RBM5, CNP, MAF1, WTAP, ACSS2, CBX8, CIAPIN1, CTNNB1, NONO, CCNB1IP1, TEX12, REC8, SYCP3, FKBP6, MLH1, SYCE1, HORMAD1, HORMAD2, SYCP2, SYCP1, CCT7, CCT5, TCP1, CCT4, CCT8, CCT2, CCT6A, CCT3  
CCT7, CCT5, TCP1, CCT4, CCT8, CCT2, CCT6A, CCT3  
1700013H16RIK, RNF17, XLR3C, XLR3B, ADAD1, XLR3A, SPINK2, GM1140, TAF7L, DDX25  
ALS2, MEF2B, DZIP3, RUSC1, CHMP7, VPS52, VPS53, WTAP, TAF7L, BC026585, NONO, HMHA1, AKNA, RALY, MEF2B, THRB, LMO4, XRCC6, ASCC1, ZFP583, CBX8, MAF1, SOHLH2, TAF7L, CCT7, CCT5, TCP1, CCT4, CCT8, CCT2, CCT6A, CCT3  
AKNA, RALY, MEF2B, THRB, LMO4, XRCC6, ASCC1, ZFP583, CBX8, MAF1, SOHLH2, TAF7L, ALS2, LDHA, BTRC, MAEL, VPS53, MAF1, GBF1, ATXN10, HTRA1, PDE4A, SH3BGR, VPS4A, THRB, DZIP3, RBM4, RBM5, ZFP583, TRIM47, HMHA1, GATA3, ZFP90, GIT2, RBCK1, RNF3A, CCT7, CCT5, TCP1, CCT4, CCT8, CCT2, CCT6A, CCT3  
NARS, DZIP3, FARS2, PPIL2, NHLRC1, ACSS2, TTLL1, TTC3, TTLL11, RBX1, QRSL1, WARS  
CCT7, CCT5, TCP1, CCT4, CCT8, CCT2, CCT6A, CCT3  
CCT7, CCT5, TCP1, CCT4, CCT8, CCT2, CCT6A, CCT3  
CCT7, CCT5, TCP1, CCT4, CCT8, CCT2, CCT6A  
CCT7, CCT5, TCP1, CCT4, CCT8, CCT2, CCT6A, CCT3  
PDP1, LMO1, DZIP3, THRB, LMO4, RBM4, RBM5, NT5DC2, ZFP583, CIAPIN1, HMHA1, TRIM47, HSP90AB1, FKBP9, P4HB, TCP1, FKBP6, TMX4, CWC27, PPIL2, CCT2, CCT6A, CCT3, CCT7, USP3, PHF20, NR3C1, CBX8, MEN1, TSPYL2, SMARCD3, ASF1B, CHD5, EHMT1, IKZF1, BAI1, CCT7, CCT5, TCP1, CCT4, CCT8, CCT2, CCT6A, CCT3  
MAD1L1, NBN, ZFP385A, MAEA, MLH1, WTAP, CDC45, ZFYVE19, CDKN2D, VPS4A, ACTR10, RALY, CEP72, 1700013H16RIK, DZIP3, TRMT2A, CHMP7, VPS52, RBM5, VPS53, WTAP, TAF7L, AKNA, RALY, MEF2B, THRB, LMO4, XRCC6, ASCC1, ZFP583, CBX8, MAF1, SOHLH2, TAF7L, DZIP3, BTRC, SENP8, FAM63A, CUL3, DCAF11, RBCK1, E4F1, FBXL15, RNF34, DCAF17, RNF17, NARS, DZIP3, FARS2, PPIL2, NHLRC1, ACSS2, TTLL1, TTC3, TTLL11, RBX1, QRSL1, WARS

TEX19.2, RNF17, NKD1, FKBP6, FHL1, CAMK2G, NANOS2, RBM4, ADAD1, SPINK2, MAEL, CCT7, PRKCQ, CCT5, TCP1, CCT4, OBFC1, CCT8, CCT2, CCT6A, CCT3  
RUSC1, TUBA3B, TUBA3A, KLC4, CCT2, KIF9, CCT3, KLC2, TTLL1, TTLL11, CYLD, DYNC  
USP3, PHF20, NR3C1, CBX8, MEN1, TSPYL2, SMARCD3, ASF1B, CHD5, EHMT1, IKZF1, BAI  
MAD1L1, ZFP385A, NBN, MAEA, NEK3, USP3, USP2, NEK1, MLH1, SYCP2, WTAP, SYCP1, P  
PDP1, LMO1, DZIP3, THRB, LMO4, RBM4, RBM5, NT5DC2, ZFP583, CIAPIN1, HMHA1, TRIM  
CCNB1IP1, PELI1, DZIP3, BTRC, PPIL2, NHLRC1, RBX1, CUL3, RNF8, MED7, RNF6, UHRF1,  
CYB5R3, LDHA, CYP2S1, PGD, EGLN2, SESN1, HADHA, BC026585, SESN3, MTHFD2, FMO5  
CCT7, CCT5, TCP1, CCT4, RAB28, CCT8, CCT2, CCT6A, CCT3  
PELI1, DZIP3, RUSC1, BTRC, PPIL2, NHLRC1, CUL3, TMEM129, RNF114, DDB2, RBCK1, RN  
CYB5R3, LDHA, CYP2S1, PGD, EGLN2, SESN1, HADHA, BC026585, SESN3, MTHFD2, FMO5  
LDHA, ACY1, ALDOC, BCKDHB, PGD, TKTL1, ACSS2, ACAT2, ACAT1, HADHA, PYCR1, PI  
PDP1, LDHA, ABHD8, ALDOC, XRCC6, ECHDC1, NFS1, PPM1B, TKTL1, ACSS2, PPCDC, AC  
AKNA, RALY, MEF2B, THRB, LMO4, XRCC6, ASCC1, ZFP583, MAF1, CBX8, SOHLH2, TAF7  
MAEA, DZIP3, BTRC, PPIL2, NHLRC1, TTC3, RBX1, CUL3, FBXO6, RBCK1, RNF167, RNF34,  
TEX12, REC8, SYCP3, SYCE1, HORMAD1, SYCP1, TEX11  
REC8, MEI4, STRA8, SYCP3, MAEL, MLH1, HORMAD1, SYCP1  
TCP1, CCT2, CCT3, CCT6A, CCT7, ACOT7, CCT5, CCT4, PACRG, CCT8, CACYBP, GNB4, GS  
ZFP385A, NBN, USP3, APLF, NEK1, XRCC6, MAEL, MLH1, MUM1, CHCHD6, RBX1, MEN1, I  
HSP90AB1, CCT7, CCT5, TCP1, CCT4, DNAJB11, CCT8, CCT2, CCT6A, DNAJB1, CCT3, HSP  
TCP1, USP2, FLOT2, CCT2, CCT6A, CCT3, CCT7, LAMP1, CCT5, MSX1, CCT4, COG7, RASSF  
TEX19.2, RBM4, SPINK2, MAEL, MOV10L1, CSPG5, TNFSF12, DLK1, SOHLH2, TAF7L, STR  
CRT1, XRCC6, ECHDC1, TKTL1, ACSS2, ACAT2, GPAT2, CIAPIN1, ACAT1, HADHA, ACA  
HSP90AB1, P4HB, TCP1, LYRM7, ANP32B, CCT2, CCT6A, CCT3, CCT7, PSMG1, CCT5, CCT4  
CCNB1IP1, REC8, SYCP3, MLH1, HORMAD1, TUBG1, ADD3, SYCP1, TEX11  
CYB5R3, LDHA, TMX4, CYP2S1, PGD, EGLN2, SESN1, HADHA, BC026585, SESN3, MTHFD2  
ZFP385A, NBN, USP3, APLF, XRCC6, MLH1, MUM1, RBX1, NONO, AEN, FBXO6, POLN, FAI  
NBN, 1700013H16RIK, ZFP385A, CPT2, LMO1, RBM4, XRCC6, MAF1, CIAPIN1, NONO, RBM  
REC8, SYCP3, FKBP6, MLH1, HORMAD1, HORMAD2, BOLL  
ZMAT1, AKNA, PPARA, MEF2B, AEBP1, THRB, XRCC6, ARID4B, MAEL, PHF20, ZFP583, SC  
ABLIM1, LMO1, LHX2, LMO4, FHL1, LHX3, LIMD2, LHX6, FHL4, SCEL, PXN  
RBPMS2, RALY, TRMT2A, RBM4, XRCC6, RBM5, RAB1B, CCT2, CCT3, ACSS2, NONO, RAE  
DZIP3, USP3, PPIL2, PHF20, NHLRC1, TTC3, RBX1, CXXC1, TRIM47, ZFYVE19, RSPRY1, RE  
WARS, CARS, NARS, RARS2, FARS2, CARS2, LARS2, SARS2  
XLR4A, 1700013H16RIK, XLR4C, XLR3C, XLR4B, XLR3B, XLR3A, GM1140, SYCP3, XLR5C,  
ABLIM1, LMO1, LHX2, LMO4, FHL1, LHX3, LIMD2, LHX6, FHL4, SCEL, PXN  
ACTB, EEF1A1, TCP1, ATP5B, STIP1, CNP, CCT2, CCT3, SIRT2, SLC25A12, CCT5, ACTR1A,  
CCT7, CCT5, TCP1, CCT4, CCT8, CCT2, CCT6A, CCT3  
CCNB1IP1, RNF17, CGRRF1, DZIP3, DTX3, NHLRC1, TTC3, RBX1, RNF8, TRIM47, RNF6, UF  
ABLIM1, LMO1, LHX2, LMO4, FHL1, LHX3, LIMD2, LHX6, FHL4, SCEL, PXN  
NBN, APLF, NEIL3, XRCC6, CINP, MLH1, MUM1, RAD54L, CDK2, UIMC1, RBX1, NONO, RN  
RALY, HSP90AB1, MAD1L1, ZFP385A, LDHA, RUSC1, XRCC6, ARID4B, H2-D1, CCT3, MAF  
TDRKH, MAEL, BRDT, MLH1, MOV10L1, SYCP2, TEX11

IQCB1, ALS2, CEP72, NEK3, USP2, NEK1, BCL2L1, MAF1, CYLD, CDC45, ZFYVE19, TSPYL2, WARS, CARS, NARS, RARS2, FARS2, CARS2, LARS2, SARS2  
CYB5R3, RNLS, PPCDC, ACADVL, FMO5, TXNRD3, ETFDH, TXNRD2, SMOX, ACAD9, MTC, ZFP385A, SERBP1, RBM4, DAZL, IGF2BP3, ANGEL2, RNF20, BOLL, FXR1  
HYAL2, UMPS, ALDOC, TYW1, NPL, DERA, GMPR, DUS3L  
DZIP3, BTRC, PPIL2, NHLRC1, RBX1, OS9, CUL3, TMEM129, DCAF11, E4F1, RNF34, FBXL1, HSP90AB1, NARS, APLF, ATP5B, PRKAG1, PRKAG2, XRCC6, RAB1B, MOV10L1, CCT2, CCT3, RBPMS2, ADAD2, RALY, FIP1L1, ZFP385A, DZIP3, TRMT2A, NANOS2, ADAD1, RBM4, RBM1, MEN1, HEX, HEXIM2, INCA1, CDK5RAP1, FBXO7  
PDP1, HSP90AB1, CYB5R3, LDHA, CPT2, NARS, COX10, AGTPBP1, ATP5B, RAB1B, MPV17, HSP90AB1, NARS, PRKAG1, ATP5B, PRKAG2, XRCC6, MOV10L1, CCT2, CCT3, ACSS2, TTL, ACADVL, ACAT2, HADH, ACAT1, HADHA, ACAT3, SLC25A17, PEX7  
USP3, MLH1, NR3C1, HDGFRP2, CALCOCO1, MEN1, NONO, CDC45, SMARCD3, LHX2, GATA1, CYB5R3, PRKAG1, PRKAG2, ACSS2, PRPS1  
TEX12, SYCE1, SYCP1, TEX11  
RNF17, CGRRF1, DTX3, NHLRC1, RBX1, RNF8, TRIM47, UHRF1, RNF114, RNF208, RSPRY1, RNLS, PTGR1, SDR39U1, GMDS, PGD, QDPR, GMPR, TECR, PYCR1, FMO5, TXNRD3, TXNR1, MEI4, STRA8, ZSCAN21, MLH1, DAZL, HORMAD1, SOHLH2  
ZBTB32, AEBP1, CNBP, MAF1, CBX8, MEN1, NONO, HEXIM2, ZFP90, E4F1, FIZ1, THAP11, RALY, ADAD2, ZMAT1, RBPMS2, ZFP385A, FIP1L1, DZIP3, TRMT2A, NANOS2, ADAD1, RBM1, EGFR, HSP90AB1, DBNL, LDHA, BAIAP2L1, FLOT2, FLOT1, SNX1, MPP7, KLC2, GCN1L1, SLC9A3R2, PARD6A, MAD1L1, MAEA, ZC3HC1, NEK3, DSN1, NEK1, CINP, SYCE1, SYCP2, SYCP1, CDK2, FECH, GMDS, APLF, NEIL3, ALDOC, XRCC6, NPL, ECHDC1, PPCDC, HADHA, UMPS, TYW1, WARS, CARS, NARS, RARS2, CARS2, LARS2, SARS2  
STRA8, ZSCAN21, DAZL, HORMAD1, SOHLH2  
REC8, STRA8, TDRKH, SPINK2, MAEL, BCL2L1, SYCP2, TEX11  
CCNB1IP1, SYCP3, SYCP1, TEX11  
RALY, ZFP326, RBM4, RBM5, SAP18, PRPF3, WTAP, DCPS, NONO, RBM4B, HNRNPM, SUG1, LDHA, ECHDC1, ACAT2, ACSS2, ACAT1, HADHA  
FECH, GMDS, APLF, NEIL3, ALDOC, XRCC6, NPL, ECHDC1, PPCDC, HADHA, UMPS, TYW1, EHMT1, PLOD1, PLOD2, ACAT2, HADH, ACAT1, ALDH9A1, HADHA  
EGFR, HSP90AB1, DBNL, LDHA, BAIAP2L1, SNX1, MPP7, KLC2, GCN1L1, SLC9A3R2, SCY1, QRSL1, WARS, CARS, NARS, RARS2, FARS2, CARS2, LARS2, SARS2  
REC8, MEI4, SYCP3, SYCP2, SYCP1  
CCNB1IP1, MAD1L1, NBN, EHMT1, FKBP6, DSN1, XRCC6, MLH1, SYCE1, SYCP2, SYCP1, DDX1, LDHA, PTGR1, SDR39U1, GMDS, PGD, QDPR, VAT1, HADHA, NAE1, BC026585, PYCR1, MTR, PPARA, AEBP1, LMO1, THRB, USP3, USP2, MAEL, TRIB3, CBX8, SUFU, MEN1, NR1H2, CUI1, NIN, TUBA3B, RUSC1, TUBA3A, KLC4, KLC2, KIF9, GAS8, TTLL1, EML5, SIRT2, TTLL11, FMO5, ACADVL, CYB5R3, RNLS, FMO5, TXNRD3, ETFDH, TXNRD2, SMOX, ACAD9, MTO1, PROL1, HSP90AB1, SPHK2, FLOT1, SNAPIN, ATP11C, VPS33B, DAGLB, TMEM175, DIRC2, DRAM2, NBN, USP3, APLF, NEIL3, XRCC6, CINP, MLH1, MUM1, RAD54L, CDK2, UIMC1, RBX1, NOX1, RNF8, UHRF1, RNF208, DDB2, RAD18, ASB4, RNF146, RNF41  
EGFR, TCP1, USP2, RELA, TRIB3, CCT2, TANK, NAE1, CUL3, RNF8, AKTIP, ARRB1, PACRC

ABLIM1, LMO1, LHX2, LMO4, FHL1, LHX3, LHX6, PXN  
ABLIM1, LMO1, LHX2, LMO4, FHL1, LHX3, LHX6, PXN  
CCNB1IP1, CNTD1, STRA8, MLH1, SYCP1, TEX11  
WARS, CARS, RARS2, CARS2, LARS2  
CGRRF1, DZIP3, DTX3, NHLRC1, TTC3, RNF8, TRIM47, RNF6, UHRF1, RNF114, RSPRY1, R/ REC8, DMRTC2, BRDT, MOV10L1, UBB  
PDP1, LYRM7, RARS2, FARS2, NFS1, LARS2, BCL2L1, ACAT1, SARS2, ISCA1, HAGH, ALAS CUL3, RNF6, MAEA, DZIP3, ARRB1, SIAH1B, BTRC, PCBP2, RBCK1, NHLRC1, RNF34, SIRT SNX17, RUSC1, SNX16, VPS52, SNX1, VPS53, VPS33B, DTNBP1, TMEM175, TMEM9B, RAB1 CEP72, MAD1L1, MAEA, RUSC1, TTLL1, TTLL11, ZFYVE19, RAB28, ACTR1A, DYNC2H1, C ISCA1, FECH, TYW1, PRIM2, NFS1, ETFDH, CDK5RAP1, CIAPIN1  
ZMAT1, AKNA, PPARA, ZBTB32, AEBP1, THRB, XRCC6, ARID4B, MAEL, PHF20, ZFP583, S RAB3A, ARFGAP3, AP1M2, SNX17, SNX16, CHMP7, SNX7, BET1, VPS52, NUP93, SNX1, VPS RALY, ZFP326, RBM4, RBM5, SAP18, PRPF3, WTAP, DCPS, NONO, RBM4B, HNRNPM, SUG CYB5R3, PDP1, CPT2, COX10, AGTPBP1, ATP5B, MPV17, GPAT2, CIAPIN1, MTHFD2, ALAS 1700013H16RIK, DMRTC2, SCML2, MAEL, RAD18  
PARD6A, MAD1L1, MAEA, ZC3HC1, NEK3, DSN1, NEK1, CINP, SYCE1, SYCP2, SYCP1, CDI CDC45, CCDC88A, STRA8, GINS3, POLD2, PRIM2, CINP, POLN, CHAF1B, NFIA  
DEAF1, PPARA, CNBP, BTRC, XRCC6, CALCOCO1, CXXC1, MEN1, NR1H2, TASP1, PRMT2, ACOT7, PPCDC, ACAT1, DCAKD  
RNF17, DTX3, NHLRC1, RNF8, TRIM47, UHRF1, RNF114, RNF208, RBCK1, RAD18, PEX10, F ACAT2, ACAT1, ACAT3  
RALY, FIP1L1, ZFP326, RBM4, RBM5, DDX1, SAP18, PRPF3, WTAP, DCPS, NONO, RBM4B, 1 TEX12, SYCP3, SYCP1  
TCP1, CCT4, CCT2  
RNLS, FMO5, TXNRD3, ETFDH, TXNRD2, SMOX, MTO1, RETSAT  
RALY, MAD1L1, ATG12, FHL1, XRCC6, ARID4B, STIP1, IGF2BP3, PPM1B, CCT3, NR3C1, M RALY, ZMAT1, RBPMS2, ZBTB32, ZFP385A, NARS, RBM4, RBM5, ASCC1, ZFP583, NONO, F CUL3, USP2, INCA1, CDK5RAP3, CDK2  
PCBP3, PCBP2, TDRKH, IGF2BP3, FXR1  
PCBP3, PCBP2, TDRKH, IGF2BP3, FXR1  
RALY, RBPMS2, RBM46, TRMT2A, RBM45, RBM4, NXF2, G3BP2, RBM5, NXF3, IGF2BP3, N FKBP6, TDRKH, CNOT10, RBM4, MAEL, PIWIL1, MOV10L1  
CDKN1C, HEXIM2, CDKN2D, INCA1  
ACADVL, CPT2, ACAT2, HADH, ACAT1, ALDH9A1, HADHA  
RAB3A, SNX17, RUSC1, SNX16, SNX7, VPS52, SNX1, VPS53, VPS33B, DTNBP1, TMEM175, 7 RALY, HSP90AB1, ZFP385A, DZIP3, TRMT2A, RBM4, XRCC6, RBM5, H2-D1, CCT3, NAP1L4 PYCR1, PGD, HADH, HADHA  
CARS, RARS2, CARS2, LARS2  
EGFR, ALS2, DBNL, NTF5, NEK3, ILK, UBB, DTNBP1  
RNF8, NBN, APLF, TDP1, XRCC6, DDX1, RAD54L, UIMC1  
PDP1, CPT2, CCDC90B, COX10, ATP5B, FARS2, NFS1, ACAT1, HADHA, MTHFD2, ALAS1, E DBNL, AP1M2, VAMP3, AP3B1

AKTIP, STX17, VPS16, VPS33B  
LDHA, THRB, PGD, RAB1B, TSPAN8, CNP, CCT2, CCT3, DNASE1L1, MMRN2, CUL3, PLOD  
ACADVL, CPT2, ACAT2, HADH, ACAT1, TECR, HADHA  
ISCA1, FECH, TYW1, PRIM2, NFS1, ETFDH, CDK5RAP1, CIAPIN1  
TBL3, BTRC, WDR70, WDR91, TSSC1, WIPI1, EML5, PEX7, BRWD1, DCAF11, WDR61, WDS  
SIRT6, SIRT7, HADH, SIRT2  
MEN1, BMP4, TAF6, GATA3, MOV10L1, RNF167  
PCBP3, PCBP2, TDRKH, ASCC1, IGF2BP3, FXR1  
HYAL2, NTF5, CCDC88A, ARRB1, SNX17, RUSC1, RAB11B, PDGFRB, RGS19, COMMD7, SL  
EGFR, ZC3HC1, NUP93, TRIB3, FAM188A, PHF20, BCL2L1, WTAP, SLC16A3, APEH, RNF6, /  
RAB11B, SDCCAG3, VPS52, VPS53, VAMP3, FCHSD1, ATP11C, VPS16, TUBG1, VPS33B, LD  
RBPMS2, MAEL, MOV10L1, CSPG5, TNFSF12, WTAP, SOHLH2, TAF7L, DDX25, DYNC2H1,  
MEI4, STRA8, HORMAD1  
ACTB, ZFP385A, USP3, THRB, RELA, SCML2, CBX8, STAT3, CALCOCO1, KLHDC3, MEN1,  
MEN1, CDKN1C, CGRRF1, SGSM3, CDKN2D, RASSF1, ILK, VASH1, MLF1  
EGFR, CUL3, MSX1, GATA3, MAEL, STRADB, CAP1, THOC5, MED1  
AP1M2, SNX17, RUSC1, SNX7, BCL2L1, VPS33B, DTNBP1, SYNGR2, SYNPR, STX17, RAB11  
HAGH, LDHA, ACAT2, ACSS2, ACAT1, ALDH9A1  
PCBP3, PCBP2, TDRKH, ASCC1, IGF2BP3, FXR1  
XLR3C, XLR3B, XLR3A  
XLR3C, XLR3B, XLR3A  
XLR3C, XLR3B, XLR3A  
BTRC, FBXO6, FBXL15, FBXO9, RBX1  
CNBP, CDC45, SSBP2, NEIL3, TDP1, OBFC1, PRIM2, MLH1, NCL  
FECH, SERPINF1, RBM4, NR3C1  
HHEX, NXF2, NUP93, NXF3  
PPARA, NBN, RELA, LMO4, BCL2L1, HDAC11, NR3C1, SUFU, SIRT2, STAT3, TAF7L, HHEX  
RAB3A, CNBP, RAB1B, CNP, NR3C1, HADHA, NONO, TRIM47, FMO5, HNRNPM, PRMT2, A  
CTNNBIP1, PRMT2, BTRC, RGS19, SLC9A3R2, SUFU, CALCOCO1, PXN, HDAC6  
FKBP6, TDRKH, CNOT10, RBM4, MAEL, PIWIL1, MOV10L1  
RALY, RBPMS2, RBM46, RBM45, RBM4, G3BP2, RBM5, IGF2BP3, NCL, BOLL, NONO, RBM  
PDP1, NPEPL1, AGTPBP1, ATP5B, XRCC6, SENP8, MOV10L1, CNP, FAM63A, AFMID, DNAS  
HSP90AB1, NARS, PRKAG1, ATP5B, PRKAG2, XRCC6, MLH1, MOV10L1, CCT2, CCT3, ACS  
HSP90AB1, EGFR, CCND1, RELA, ARAF, PDGFRA, PDGFRB, PIK3R3, CDK2  
BRWD1, TBL3, WDR61, WDSUB1, BTRC, DDB2, FBXW2, GNB4, WDR70, CHAF1B, TSSC1, E  
EGFR, TMEM175, LAMP1, SNX17, VPS52, SNX1, VPS53, ABCB6, WIPI1, DTNBP1, GRB14  
RAB3A, ARFGAP3, AP1M2, SNX17, SNX16, CHMP7, SNX7, VPS52, BET1, NUP93, SNX1, VPS  
EGFR, CCND1, RASSF1, ARAF, DAPK2, DAPK3  
PARD6A, H2-K1, EGFR, ARFGAP3, CHMP7, H2-D1, SNX1, CYTH2, LDLRAP1, GBF1, SH3GL  
STX17, SNAPIN, MCOLN1, VPS16  
PDP1, NPEPL1, AGTPBP1, ATP5B, XRCC6, SENP8, MOV10L1, CNP, TMEM62, FAM63A, AFM  
RALY, RBPMS2, RBM46, RBM45, RBM4, G3BP2, RBM5, IGF2BP3, NCL, BOLL, NONO, RBM  
MEN1, HHEX, ZBTB32, IKZF1, PDGFRB, ROGDI, TXNRD2, CIAPIN1, MELK

AKNA, PPARA, MEF2B, CRTCL1, RBM4, XRCC6, GCN1L1, CALCOCO1, CXXC1, NR1H2, NOT1, TBL3, DCAF11, WDR61, WDSUB1, BTRC, FBXW2, GNB4, WDR70, PEX7  
TBL3, BTRC, WDR70, WDR91, TSSC1, WIPI1, EML5, PEX7, BRWD1, DCAF11, WDR61, WDSUB1, HSP90AB1, PRKAG1, PRKAG2, TRIB3, BCL2L1, GCN1L1, PXN, SUFU, CYLD, CDKN2D, STXBP1, RBM4B, ZFP385A, NANOS2, DDX25, CNOT10, ADAD1, PIWIL1, DAZL, IGF2BP3, GCN1L1, ESR1, WARS, CARS, CARS2, LARS2  
LDHA, SEC1, COX10, ALG1, ATP5B, CYP2S1, PGD, ACSS2, GPAT2, AFMID, PIGK, MTHFD2, ACADVL, CYB5R3, FMO5, TXNRD3, TXNRD2, ACAD9, MTO1, DUS3L  
ACAT2, ACAT1, ACAT3  
PRKCQ, TCP1, CCT4, OBFC1, CCT2  
PRDM9, ZFP120, IKZF1, ZSCAN21, ZFP647, ZFP90, BNC1, ZFP672, ZFP629, E4F1, ZFP583, FIZ1, RALY, ZFP212, MED16, DDX1, PHF21A, CALCOCO1, MED1  
TBL3, MPV17, WDR70, WDR91, TSSC1, WIPI1, EML5, PEX7, BRWD1, DCAF11, WDR61, WDSUB1, AKNA, MEF2B, PPARA, LMO1, THRB, LMO4, ARID4B, XRCC6, SOHLH2, MEN1, STRA8, GATA1, WARS, CARS, RARS2, CARS2, LARS2, PAPSS1  
CDC45, CCDC88A, STRA8, GINS3, POLD2, PRIM2, CINP, POLN, E4F1, CHAF1B, NFIA, RNF8, UHRF1, USP3, ANP32B, PHF21A, BRDT, ASF1B, CHAF1B, RNF20, NCL, UIMC1, NR1H2, PRKCQ, PPARA, RELA, PRKAG1, PRKAG2, TRIB3, SLC27A3, PIK3R3, STAT3, RNF8, AEN, NEK1, XRCC6, CYP2R1, RAD54L, UIMC1  
ALDOC, PGD, DERA, TKTL1, PRPS1  
ACAT2, ACAT1, ACAT3  
ACAT2, ACAT1, ACAT3  
SIRT6, SIRT7, SIRT2  
SIRT6, SIRT7, SIRT2  
FKBP6, TDRKH, MAEL, PIWIL1, MOV10L1  
BMP4, PTPN6, HYAL2, SMPD1, CDK5RAP3, GBA  
DEAF1, MEF2B, IKZF1, RELA, LMO4, XRCC6, ASCC1, SAP18, DAZAP2, ECSIT, CDK2, MED1, TBL3, MPV17, WDR70, WDR91, TSSC1, WIPI1, EML5, PEX7, BRWD1, DCAF11, WDR61, WDSUB1, TBL3, MPV17, WDR70, WDR91, TSSC1, WIPI1, EML5, PEX7, BRWD1, DCAF11, WDR61, WDSUB1, UHRF1, UBC, UBB, GM1821  
PPARA, CDK5RAP3, BCL2L1  
TBL3, BTRC, WDR70, WDR91, TSSC1, WIPI1, EML5, PEX7, BRWD1, DCAF11, WDR61, WDSUB1, TBL3, MPV17, WDR70, WDR91, TSSC1, EML5, PEX7, BRWD1, DCAF11, WDR61, WDSUB1, MDC1, DCAF11, DDB2, DCAF17, RBX1  
NKD1, SGSM3, SNX1, EGLN2, TRIB3, TNFSF12, NSF  
CEP72, MAD1L1, MAEA, RUSC1, TTLL1, TTLL11, ZFYVE19, RAB28, ACTR1A, DYNC2H1, CENPA, ZFP385A, NANOS2, DDX25, CNOT10, PIWIL1, DAZL, IGF2BP3, GCN1L1, BOLL  
PCBP3, PCBP2, TDRKH, ASCC1, IGF2BP3, FXR1  
SIRT6, SIRT7, SIRT2  
RALY, FIP1L1, ZFP326, RBM4, RBM5, DDX1, SAP18, PRPF3, WTAP, DCPS, NONO, RBM4B, PLD3, CYB5R3, CPT2, CHKB, PRKAG1, PRKAG2, PLBD1, PNPLA2, GPAT2, TECR, LDLRAP1, PRDM9, ZFP120, ZFP647, ZFP90, ZFP672, ZFP629, ZFP583, FIZ1, ZFP526  
FKBP6, TDRKH, MAEL, MOV10L1

ACAT2, HADH, ACAT1, ALDH9A1, HADHA, AFMID  
ALDOC, PGD, IDH1, ENO3, TKTL1, ACAT2, ACSS2, ACAT1, HADHA, PRPS1  
ACAT2, ACAT1, ACAT3  
ACAT2, ACAT1, ACAT3  
ACAT2, ACAT1, ACAT3  
GM13305, IL11RA2, IL11RA1  
ACADVL, CYB5R3, FMO5, TXNRD3, ETFDH, TXNRD2, MTO1  
AP1M2, SNX17, RUSC1, SNX7, BCL2L1, VPS33B, SYNGR2, DTNBP1, SYNPR, STX17, RAB11  
TCP1, NIN, NEK1, TUBG1  
PRDM9, ZFP647, ZFP90, ZFP672, ZFP629, ZFP583, FIZ1, ZFP526  
CYB5R3, RNLS, LDHA, SIRT6, SIRT7, HADHA, SIRT2, MTHFD2, HADH, HSD17B7, ALDH9A  
RNF8, NBN, APLF, RAD18, KDM4D  
EGFR, CCND1, RELA, ARAF, BCL2L1, PIK3R3, STAT3  
EGFR, CCND1, CAMK2G, ARAF, PDGFRA, PDGFRB, PIK3R3  
PTPN6, ZFP385A, VPS33B, MED1  
ACER3, SPHK2, GBA  
DKK1, SFRP2, RGS19  
HTRA1, PCBP2, PPM1B  
TSC22D3, DKK1, USP2  
SLC37A4, JAM3, MLF1  
BMP4, LHX2, OTX2  
MEN1, RNF20, TET1  
TUBA3B, TUBA3A, ANKMY2, GAS8, SUFU, TTLL11, SLC25A31, CCT4, SPAG4, PACRG, CC  
STX17, SYN2, BET1, SNAP47, VAMP3, YKT6  
GAL3ST3, ARFGAP3, SEC1, AP1M2, SLC39A13, RUSC1, VPS52, BET1, SNX1, VPS53, CSPG5,  
SPHK2, SNX16, PLBD1, SNAPIN, VPS33B, TMEM175, LAMP1, DIRC2, DRAM2, TMEM9B, SM  
HSP90AB1, P4HB, LAMP1, CCT4, SERPINF1, FLOT1, CNP, GCHFR, HSPA8  
CUL3, UHRF1, MAEA, DZIP3, SIAH1B, RNF34, RNF146, FBXO7, SPOP, RBX1, OS9  
RNF8, RNF6, PELI1, RNF34, TTC3, RNF146  
PRDM9, ZFP120, ZSCAN21, ZFP647, ZFP90, ZFP672, ZFP629, E4F1, ZFP583, FIZ1, ZFP526  
ALS2, RAB3A, ATG12, PRKAG1, SNX17, XRCC6, SNX1, STIP1, NR3C1, KLC2, PEX3, MEN1,  
RAB3A, NRF1, MSTO1, AGTPBP1, COX10, PRKAG1, PRKAG2, FANCG  
RBPMS2, MAEL, MOV10L1, CSPG5, TNFSF12, WTAP, SOHLH2, TAF7L, DDX25, DYNC2H1,  
HMHA1, PACSIN3, FCHSD1, FCHO1  
CCND1, SIAH1B, SHISA5, DDB2, SESN1, CDK2, SESN3  
DKK1, SNX17, LDLRAP1, SLC9A3R2  
RNF8, CUL3, CYLD, RNF6, USP3, USP2, SIAH1B, BTRC, RNF20, TTC3, RBX1, HDAC6  
QRSL1, WARS, EEF1A1, CARS, NARS, RARS2, FARS2, CARS2, LARS2, EEFSEC, SARS2  
MSTO1, TUBA3B, TUBA3A, TUBG1  
HMHA1, PACSIN3, FCHSD1, FCHO1  
LHX2, LHX3, OTX2, DYNC2H1, TGIF1, FBXL15  
ARFGAP3, AP1M2, BET1, VPS33B, CUL3, GBF1, SCYL1, ARF2, STX17, VPS4A, VAMP3, YKT  
REC8, SYCP3, MLH1, SYCP1

CCNB1IP1, MAD1L1, NBN, EHMT1, FKBP6, DSN1, XRCC6, SYCE1, SYCP2, SYCP1, DAPK3,  
RNF8, NBN, APLF, PPP1R8, RASIP1, SLC4A1AP  
ZBTB32, IKZF1, ZFP414, ZHX1, ZFP672, ZFP629, ZFP583, PRDM9, ZFP120, ZSCAN21, ZFP647  
NUCB1, SLC35C2, P4HB, GBF1, SCYL1, STX17, RAB1B  
CYLD, PELI1, PRMT2, ARRB1, RBCK1, CDK5RAP3, COMMD7  
ARRB1, LDLRAP1, FCHO1  
HSP90AB1, GCN1L1, CDK5RAP1  
HSP90AB1, CDKN1C, HTRA1, LHX3, IL11RA1, ETNK2  
ACADVL, DGAT2, THRB  
4933416C03RIK, TAF12, TAF7L  
EGFR, CCND1, ILK, ARAF, MLH1, PIK3R3  
RBM4B, USP2, CRTCL1, RBM4  
CYLD, SMARCD3, SNAPIN, LDLRAP1  
RNF8, NBN, APLF, PPP1R8, SLC4A1AP  
4933416C03RIK, TAF12, TAF6, TAF7L

| Count | %           | List Total | Pop Hits | Pop Total | Fold Enrichment | Bonferroni  | Benjamini |
|-------|-------------|------------|----------|-----------|-----------------|-------------|-----------|
| 420   | 50.48076923 | 825        | 7617     | 22680     | 1.515843747     | 3.49E-23    | 3.49E-23  |
| 348   | 41.82692308 | 753        | 6019     | 19662     | 1.509689436     | 1.56E-17    | 1.56E-17  |
| 267   | 32.09134615 | 825        | 4534     | 22680     | 1.618895617     | 2.66E-15    | 1.33E-15  |
| 261   | 31.37019231 | 825        | 4404     | 22680     | 1.629229626     | 3.42E-15    | 1.14E-15  |
| 359   | 43.14903846 | 753        | 6631     | 19662     | 1.413670307     | 4.17E-13    | 2.08E-13  |
| 198   | 23.79807692 | 825        | 3125     | 22680     | 1.741824        | 4.45E-13    | 1.11E-13  |
| 266   | 31.97115385 | 825        | 4779     | 22680     | 1.530148947     | 8.71E-12    | 1.74E-12  |
| 23    | 2.764423077 | 825        | 90       | 22680     | 7.025454545     | 2.77E-10    | 4.61E-11  |
| 31    | 3.725961538 | 825        | 188      | 22680     | 4.533075435     | 3.01E-09    | 4.31E-10  |
| 23    | 2.764423077 | 715        | 95       | 18082     | 6.122723592     | 3.40E-08    | 3.40E-08  |
| 132   | 15.86538462 | 825        | 2099     | 22680     | 1.728823249     | 1.49E-07    | 1.86E-08  |
| 230   | 27.64423077 | 685        | 4092     | 17446     | 1.431520289     | 7.00E-07    | 7.00E-07  |
| 8     | 0.961538462 | 715        | 8        | 18082     | 25.28951049     | 2.93E-06    | 1.47E-06  |
| 45    | 5.408653846 | 715        | 407      | 18082     | 2.796137523     | 3.79E-06    | 1.26E-06  |
| 84    | 10.09615385 | 685        | 1075     | 17446     | 1.990105585     | 1.71E-06    | 8.56E-07  |
| 8     | 0.961538462 | 753        | 9        | 19662     | 23.21027003     | 2.10E-06    | 7.01E-07  |
| 125   | 15.02403846 | 753        | 1935     | 19662     | 1.68679288      | 2.72E-06    | 6.80E-07  |
| 12    | 1.442307692 | 753        | 31       | 19662     | 10.10769824     | 5.37E-06    | 1.07E-06  |
| 8     | 0.961538462 | 774        | 10       | 20594     | 21.28578811     | 1.46E-05    | 1.46E-05  |
| 8     | 0.961538462 | 774        | 10       | 20594     | 21.28578811     | 1.46E-05    | 1.46E-05  |
| 25    | 3.004807692 | 715        | 160      | 18082     | 3.951486014     | 4.79E-05    | 1.20E-05  |
| 261   | 31.37019231 | 743        | 4691     | 18012     | 1.348801993     | 3.36E-05    | 3.36E-05  |
| 112   | 13.46153846 | 825        | 1799     | 22680     | 1.711496286     | 7.35E-06    | 8.17E-07  |
| 8     | 0.961538462 | 774        | 11       | 20594     | 19.35071647     | 3.88E-05    | 1.94E-05  |
| 114   | 13.70192308 | 825        | 1859     | 22680     | 1.685833048     | 1.24E-05    | 1.24E-06  |
| 114   | 13.70192308 | 753        | 1784     | 19662     | 1.668563415     | 2.80E-05    | 4.66E-06  |
| 99    | 11.89903846 | 825        | 1565     | 22680     | 1.739041534     | 2.74E-05    | 2.49E-06  |
| 8     | 0.961538462 | 753        | 13       | 19662     | 16.06864848     | 8.76E-05    | 1.25E-05  |
| 34    | 4.086538462 | 825        | 330      | 22680     | 2.832396694     | 5.55E-05    | 4.62E-06  |
| 8     | 0.961538462 | 774        | 14       | 20594     | 15.20413437     | 3.66E-04    | 1.22E-04  |
| 8     | 0.961538462 | 774        | 14       | 20594     | 15.20413437     | 3.66E-04    | 1.22E-04  |
| 7     | 0.841346154 | 715        | 9        | 18082     | 19.66961927     | 7.34E-04    | 1.47E-04  |
| 8     | 0.961538462 | 774        | 15       | 20594     | 14.19052541     | 6.64E-04    | 1.66E-04  |
| 176   | 21.15384615 | 825        | 3395     | 22680     | 1.425154639     | 1.95E-04    | 1.50E-05  |
| 20    | 2.403846154 | 715        | 128      | 18082     | 3.951486014     | 0.00170516  | 2.84E-04  |
| 29    | 3.485576923 | 825        | 270      | 22680     | 2.952727273     | 2.28E-04    | 1.63E-05  |
| 8     | 0.961538462 | 715        | 15       | 18082     | 13.48773893     | 0.001846602 | 2.64E-04  |
| 49    | 5.889423077 | 825        | 626      | 22680     | 2.151844322     | 3.44E-04    | 2.30E-05  |
| 161   | 19.35096154 | 825        | 3076     | 22680     | 1.438893486     | 4.00E-04    | 2.50E-05  |
| 116   | 13.94230769 | 715        | 1885     | 18082     | 1.556277569     | 0.003197399 | 4.00E-04  |
| 49    | 5.889423077 | 825        | 631      | 22680     | 2.134793257     | 4.20E-04    | 2.47E-05  |
| 35    | 4.206730769 | 685        | 362      | 17446     | 2.462434972     | 0.002067729 | 6.90E-04  |

|     |             |     |      |       |             |             |             |
|-----|-------------|-----|------|-------|-------------|-------------|-------------|
| 49  | 5.889423077 | 825 | 646  | 22680 | 2.085223755 | 8.16E-04    | 4.54E-05    |
| 10  | 1.201923077 | 715 | 32   | 18082 | 7.902972028 | 0.007141498 | 7.96E-04    |
| 32  | 3.846153846 | 753 | 327  | 19662 | 2.555259086 | 0.001830735 | 2.29E-04    |
| 28  | 3.365384615 | 715 | 266  | 18082 | 2.662053736 | 0.018746985 | 0.001890704 |
| 48  | 5.769230769 | 715 | 614  | 18082 | 1.977030136 | 0.029954331 | 0.002760921 |
| 175 | 21.03365385 | 685 | 3355 | 17446 | 1.328467153 | 0.024628077 | 0.006214714 |
| 22  | 2.644230769 | 685 | 199  | 17446 | 2.815625573 | 0.031773983 | 0.006437138 |
| 45  | 5.408653846 | 825 | 639  | 22680 | 1.935979513 | 0.013609638 | 7.21E-04    |
| 9   | 1.081730769 | 715 | 35   | 18082 | 6.503016983 | 0.126470412 | 0.01120453  |
| 15  | 1.802884615 | 715 | 103  | 18082 | 3.682938421 | 0.127826573 | 0.01046539  |
| 45  | 5.408653846 | 685 | 604  | 17446 | 1.897496012 | 0.050471593 | 0.008594493 |
| 22  | 2.644230769 | 295 | 214  | 7720  | 2.690321559 | 0.014953475 | 0.014953475 |
| 38  | 4.567307692 | 685 | 479  | 17446 | 2.020474529 | 0.058712267 | 0.008606523 |
| 126 | 15.14423077 | 715 | 2279 | 18082 | 1.398191453 | 0.167598058 | 0.013017378 |
| 29  | 3.485576923 | 685 | 326  | 17446 | 2.265612825 | 0.074999552 | 0.009697802 |
| 7   | 0.841346154 | 715 | 21   | 18082 | 8.42983683  | 0.270706243 | 0.020825339 |
| 8   | 0.961538462 | 715 | 30   | 18082 | 6.743869464 | 0.294139943 | 0.021535862 |
| 14  | 1.682692308 | 753 | 102  | 19662 | 3.583938755 | 0.070879785 | 0.0081353   |
| 34  | 4.086538462 | 715 | 420  | 18082 | 2.047246087 | 0.311315847 | 0.021700639 |
| 12  | 1.442307692 | 685 | 75   | 17446 | 4.074978102 | 0.124568047 | 0.014673267 |
| 16  | 1.923076923 | 715 | 128  | 18082 | 3.161188811 | 0.342043597 | 0.022988131 |
| 53  | 6.370192308 | 715 | 780  | 18082 | 1.718389815 | 0.344387142 | 0.021975202 |
| 36  | 4.326923077 | 715 | 463  | 18082 | 1.966355027 | 0.398637894 | 0.025107335 |
| 19  | 2.283653846 | 825 | 191  | 22680 | 2.734697763 | 0.070840901 | 0.003667025 |
| 9   | 1.081730769 | 753 | 44   | 19662 | 5.340999638 | 0.116194231 | 0.012275826 |
| 47  | 5.649038462 | 715 | 676  | 18082 | 1.758294368 | 0.463830205 | 0.029245001 |
| 27  | 3.245192308 | 825 | 336  | 22680 | 2.209090909 | 0.084809773 | 0.004211267 |
| 54  | 6.490384615 | 753 | 842  | 19662 | 1.674612713 | 0.133243817 | 0.012915646 |
| 7   | 0.841346154 | 715 | 24   | 18082 | 7.376107226 | 0.507201984 | 0.031654348 |
| 86  | 10.33653846 | 825 | 1604 | 22680 | 1.473951485 | 0.091497452 | 0.00435221  |
| 11  | 1.322115385 | 825 | 74   | 22680 | 4.086486486 | 0.105144832 | 0.004818501 |
| 106 | 12.74038462 | 685 | 1936 | 17446 | 1.39445919  | 0.249460368 | 0.028288454 |
| 33  | 3.966346154 | 774 | 445  | 20594 | 1.973120808 | 0.381561213 | 0.091637193 |
| 8   | 0.961538462 | 825 | 38   | 22680 | 5.787559809 | 0.120404585 | 0.005331289 |
| 13  | 1.5625      | 774 | 101  | 20594 | 3.424693632 | 0.409729766 | 0.08411317  |
| 11  | 1.322115385 | 774 | 74   | 20594 | 3.955129548 | 0.430694743 | 0.07732381  |
| 19  | 2.283653846 | 753 | 192  | 19662 | 2.583955843 | 0.205468998 | 0.018984422 |
| 8   | 0.961538462 | 715 | 36   | 18082 | 5.61989122  | 0.68736221  | 0.049296087 |
| 24  | 2.884615385 | 774 | 286  | 20594 | 2.232774977 | 0.499360225 | 0.08284937  |
| 11  | 1.322115385 | 409 | 74   | 10425 | 3.788905042 | 0.140255313 | 0.140255313 |
| 23  | 2.764423077 | 825 | 279  | 22680 | 2.26627566  | 0.178111252 | 0.00781531  |
| 80  | 9.615384615 | 825 | 1505 | 22680 | 1.461310782 | 0.191226401 | 0.008129707 |
| 7   | 0.841346154 | 715 | 28   | 18082 | 6.322377622 | 0.822996016 | 0.069608016 |

|    |             |     |      |       |             |             |             |
|----|-------------|-----|------|-------|-------------|-------------|-------------|
| 32 | 3.846153846 | 753 | 435  | 19662 | 1.920849934 | 0.311339057 | 0.028285058 |
| 8  | 0.961538462 | 685 | 39   | 17446 | 5.2243309   | 0.457272689 | 0.054043727 |
| 14 | 1.682692308 | 825 | 130  | 22680 | 2.960559441 | 0.263563741 | 0.011266885 |
| 9  | 1.081730769 | 685 | 53   | 17446 | 4.324858835 | 0.575926456 | 0.06899196  |
| 8  | 0.961538462 | 774 | 44   | 20594 | 4.837679117 | 0.783901446 | 0.156524584 |
| 28 | 3.365384615 | 715 | 362  | 18082 | 1.956094734 | 0.95882762  | 0.119794174 |
| 89 | 10.69711538 | 825 | 1754 | 22680 | 1.394920701 | 0.337753861 | 0.014610712 |
| 38 | 4.567307692 | 825 | 601  | 22680 | 1.738193919 | 0.3573264   | 0.015129835 |
| 6  | 0.721153846 | 715 | 22   | 18082 | 6.897139224 | 0.975638896 | 0.133138164 |
| 91 | 10.9375     | 753 | 1721 | 19662 | 1.380680648 | 0.534543669 | 0.053158974 |
| 72 | 8.653846154 | 825 | 1363 | 22680 | 1.452197692 | 0.382010009 | 0.015914767 |
| 8  | 0.961538462 | 715 | 44   | 18082 | 4.598092816 | 0.982807906 | 0.139716077 |
| 33 | 3.966346154 | 685 | 466  | 17446 | 1.803571317 | 0.749486642 | 0.101007182 |
| 5  | 0.600961538 | 685 | 14   | 17446 | 9.095933264 | 0.770838033 | 0.099889359 |
| 4  | 0.480769231 | 753 | 7    | 19662 | 14.92088788 | 0.606304126 | 0.060253484 |
| 18 | 2.163461538 | 743 | 186  | 18012 | 2.346025268 | 0.958193651 | 0.79553399  |
| 16 | 1.923076923 | 825 | 175  | 22680 | 2.513454545 | 0.464142335 | 0.019924214 |
| 7  | 0.841346154 | 715 | 34   | 18082 | 5.206663924 | 0.993644436 | 0.165279233 |
| 34 | 4.086538462 | 825 | 534  | 22680 | 1.750357508 | 0.52315889  | 0.022877131 |
| 48 | 5.769230769 | 685 | 780  | 17446 | 1.56729927  | 0.854243787 | 0.120487927 |
| 24 | 2.884615385 | 753 | 316  | 19662 | 1.983155984 | 0.736214909 | 0.079914598 |
| 26 | 3.125       | 825 | 372  | 22680 | 1.921407625 | 0.565904684 | 0.024970557 |
| 14 | 1.682692308 | 825 | 146  | 22680 | 2.63611457  | 0.583686618 | 0.025444714 |
| 7  | 0.841346154 | 715 | 36   | 18082 | 4.917404817 | 0.998945629 | 0.210513692 |
| 5  | 0.600961538 | 825 | 17   | 22680 | 8.085561497 | 0.610556238 | 0.026584132 |
| 8  | 0.961538462 | 715 | 49   | 18082 | 4.128899672 | 0.99954228  | 0.226096791 |
| 4  | 0.480769231 | 715 | 8    | 18082 | 12.64475524 | 0.999557766 | 0.220537476 |
| 19 | 2.283653846 | 825 | 240  | 22680 | 2.176363636 | 0.642720572 | 0.028185095 |
| 6  | 0.721153846 | 295 | 27   | 7720  | 5.815442561 | 0.540926805 | 0.322450596 |
| 14 | 1.682692308 | 685 | 139  | 17446 | 2.565184057 | 0.938624659 | 0.160057377 |
| 8  | 0.961538462 | 295 | 52   | 7720  | 4.026075619 | 0.561842131 | 0.240472438 |
| 22 | 2.644230769 | 685 | 279  | 17446 | 2.008277739 | 0.942937444 | 0.155024359 |
| 9  | 1.081730769 | 295 | 66   | 7720  | 3.568567026 | 0.568543803 | 0.189535162 |
| 5  | 0.600961538 | 753 | 17   | 19662 | 7.67986876  | 0.838164425 | 0.101589248 |
| 25 | 3.004807692 | 753 | 344  | 19662 | 1.89764199  | 0.847029515 | 0.09905055  |
| 17 | 2.043269231 | 774 | 199  | 20594 | 2.272979887 | 0.990326567 | 0.371134075 |
| 45 | 5.408653846 | 715 | 729  | 18082 | 1.561080894 | 0.999900051 | 0.250117677 |
| 20 | 2.403846154 | 825 | 264  | 22680 | 2.082644628 | 0.71741481  | 0.033579353 |
| 12 | 1.442307692 | 825 | 118  | 22680 | 2.79568567  | 0.722068375 | 0.033132887 |
| 19 | 2.283653846 | 753 | 234  | 19662 | 2.120168897 | 0.879078611 | 0.105231491 |
| 24 | 2.884615385 | 715 | 318  | 18082 | 1.908642301 | 0.999971102 | 0.271465034 |
| 8  | 0.961538462 | 715 | 52   | 18082 | 3.890693921 | 0.999980072 | 0.272640674 |
| 22 | 2.644230769 | 685 | 284  | 17446 | 1.972920736 | 0.971933199 | 0.180047876 |

|    |             |     |      |       |             |             |             |
|----|-------------|-----|------|-------|-------------|-------------|-------------|
| 8  | 0.961538462 | 743 | 50   | 18012 | 3.878761777 | 0.999358637 | 0.913761458 |
| 8  | 0.961538462 | 743 | 50   | 18012 | 3.878761777 | 0.999358637 | 0.913761458 |
| 6  | 0.721153846 | 715 | 28   | 18082 | 5.419180819 | 0.999989012 | 0.278374834 |
| 5  | 0.600961538 | 743 | 17   | 18012 | 7.130076795 | 0.999585643 | 0.857326346 |
| 19 | 2.283653846 | 409 | 234  | 10425 | 2.06961946  | 0.717789375 | 0.468765    |
| 5  | 0.600961538 | 715 | 19   | 18082 | 6.655134339 | 0.999999752 | 0.344585744 |
| 16 | 1.923076923 | 753 | 188  | 19662 | 2.222259897 | 0.957588421 | 0.146164471 |
| 14 | 1.682692308 | 715 | 149  | 18082 | 2.376195616 | 0.999999908 | 0.354641836 |
| 28 | 3.365384615 | 825 | 443  | 22680 | 1.737574389 | 0.879856569 | 0.052885327 |
| 56 | 6.730769231 | 825 | 1073 | 22680 | 1.434753876 | 0.885003293 | 0.052635438 |
| 8  | 0.961538462 | 825 | 61   | 22680 | 3.605365127 | 0.885360367 | 0.051457169 |
| 94 | 11.29807692 | 685 | 1847 | 17446 | 1.296182802 | 0.997157941 | 0.265518786 |
| 34 | 4.086538462 | 825 | 577  | 22680 | 1.61991492  | 0.905945395 | 0.054728273 |
| 19 | 2.283653846 | 715 | 241  | 18082 | 1.993778835 | 0.999999996 | 0.398792859 |
| 55 | 6.610576923 | 825 | 1058 | 22680 | 1.429111531 | 0.918757988 | 0.056708194 |
| 5  | 0.600961538 | 753 | 21   | 19662 | 6.217036615 | 0.982842528 | 0.17600164  |
| 26 | 3.125       | 715 | 374  | 18082 | 1.758094312 | 0.999999998 | 0.398503639 |
| 10 | 1.201923077 | 825 | 95   | 22680 | 2.893779904 | 0.923493587 | 0.056744174 |
| 36 | 4.326923077 | 715 | 576  | 18082 | 1.580594406 | 0.999999999 | 0.399872311 |
| 4  | 0.480769231 | 715 | 11   | 18082 | 9.196185633 | 0.999999999 | 0.399033691 |
| 14 | 1.682692308 | 774 | 163  | 20594 | 2.285284    | 0.999988367 | 0.644017871 |
| 3  | 0.360576923 | 685 | 4    | 17446 | 19.10145985 | 0.999472202 | 0.314317025 |
| 21 | 2.524038462 | 825 | 307  | 22680 | 1.880485638 | 0.947329828 | 0.063321984 |
| 3  | 0.360576923 | 715 | 4    | 18082 | 18.96713287 | 1           | 0.424411029 |
| 3  | 0.360576923 | 715 | 4    | 18082 | 18.96713287 | 1           | 0.424411029 |
| 8  | 0.961538462 | 774 | 63   | 20594 | 3.378696526 | 0.999994105 | 0.633388949 |
| 50 | 6.009615385 | 825 | 953  | 22680 | 1.442335209 | 0.958758115 | 0.066963436 |
| 66 | 7.932692308 | 685 | 1237 | 17446 | 1.358875074 | 0.999736917 | 0.324651098 |
| 5  | 0.600961538 | 685 | 22   | 17446 | 5.788321168 | 0.999781632 | 0.318290252 |
| 5  | 0.600961538 | 743 | 21   | 18012 | 5.771966929 | 0.999999967 | 0.968166995 |
| 5  | 0.600961538 | 743 | 21   | 18012 | 5.771966929 | 0.999999967 | 0.968166995 |
| 20 | 2.403846154 | 774 | 281  | 20594 | 1.893753391 | 0.999998285 | 0.639845129 |
| 7  | 0.841346154 | 825 | 51   | 22680 | 3.773262032 | 0.966523292 | 0.069724576 |
| 4  | 0.480769231 | 685 | 12   | 17446 | 8.489537713 | 0.999842026 | 0.316527424 |
| 7  | 0.841346154 | 295 | 49   | 7720  | 3.738498789 | 0.921752876 | 0.399250141 |
| 33 | 3.966346154 | 753 | 544  | 19662 | 1.583972932 | 0.996636472 | 0.228063466 |
| 60 | 7.211538462 | 685 | 1113 | 17446 | 1.372971059 | 0.999927146 | 0.327639326 |
| 4  | 0.480769231 | 774 | 13   | 20594 | 8.186841582 | 0.9999997   | 0.65797129  |
| 4  | 0.480769231 | 774 | 13   | 20594 | 8.186841582 | 0.9999997   | 0.65797129  |
| 8  | 0.961538462 | 715 | 63   | 18082 | 3.211366411 | 1           | 0.513706716 |
| 8  | 0.961538462 | 715 | 63   | 18082 | 3.211366411 | 1           | 0.513706716 |
| 30 | 3.605769231 | 825 | 510  | 22680 | 1.617112299 | 0.981363424 | 0.079622568 |
| 4  | 0.480769231 | 753 | 13   | 19662 | 8.034324241 | 0.998417157 | 0.244496588 |

|     |             |     |      |       |             |             |             |
|-----|-------------|-----|------|-------|-------------|-------------|-------------|
| 4   | 0.480769231 | 753 | 13   | 19662 | 8.034324241 | 0.998417157 | 0.244496588 |
| 125 | 15.02403846 | 753 | 2674 | 19662 | 1.220622372 | 0.998466721 | 0.236631524 |
| 7   | 0.841346154 | 295 | 51   | 7720  | 3.591890994 | 0.954227443 | 0.40190864  |
| 8   | 0.961538462 | 685 | 64   | 17446 | 3.183576642 | 0.99997762  | 0.348379825 |
| 18  | 2.163461538 | 825 | 256  | 22680 | 1.932954545 | 0.98603399  | 0.083474962 |
| 4   | 0.480769231 | 685 | 13   | 17446 | 7.83649635  | 0.999984376 | 0.346650558 |
| 6   | 0.721153846 | 715 | 36   | 18082 | 4.214918415 | 1           | 0.537888908 |
| 6   | 0.721153846 | 774 | 38   | 20594 | 4.201142391 | 0.999999975 | 0.688784043 |
| 13  | 1.5625      | 753 | 151  | 19662 | 2.248014564 | 0.99924243  | 0.249800274 |
| 17  | 2.043269231 | 753 | 226  | 19662 | 1.964143426 | 0.999281554 | 0.243006602 |
| 11  | 1.322115385 | 753 | 116  | 19662 | 2.476095618 | 0.99932472  | 0.236914002 |
| 50  | 6.009615385 | 825 | 976  | 22680 | 1.408345753 | 0.991416626 | 0.090771248 |
| 3   | 0.360576923 | 715 | 5    | 18082 | 15.17370629 | 1           | 0.567925654 |
| 17  | 2.043269231 | 753 | 228  | 19662 | 1.946914098 | 0.999592237 | 0.243266183 |
| 9   | 1.081730769 | 715 | 81   | 18082 | 2.80994561  | 1           | 0.563136133 |
| 9   | 1.081730769 | 715 | 81   | 18082 | 2.80994561  | 1           | 0.563136133 |
| 37  | 4.447115385 | 753 | 646  | 19662 | 1.49555339  | 0.999744301 | 0.248154569 |
| 6   | 0.721153846 | 295 | 39   | 7720  | 4.026075619 | 0.978832773 | 0.423486957 |
| 6   | 0.721153846 | 409 | 38   | 10425 | 4.024578561 | 0.983410539 | 0.744958554 |
| 3   | 0.360576923 | 743 | 5    | 18012 | 14.54535666 | 1           | 0.989957549 |
| 3   | 0.360576923 | 743 | 5    | 18012 | 14.54535666 | 1           | 0.989957549 |
| 3   | 0.360576923 | 743 | 5    | 18012 | 14.54535666 | 1           | 0.989957549 |
| 5   | 0.600961538 | 715 | 25   | 18082 | 5.057902098 | 1           | 0.585457191 |
| 9   | 1.081730769 | 685 | 83   | 17446 | 2.761656846 | 0.999999038 | 0.401384584 |
| 4   | 0.480769231 | 715 | 14   | 18082 | 7.225574426 | 1           | 0.586127544 |
| 4   | 0.480769231 | 715 | 14   | 18082 | 7.225574426 | 1           | 0.586127544 |
| 23  | 2.764423077 | 685 | 342  | 17446 | 1.712801468 | 0.999999155 | 0.393118899 |
| 49  | 5.889423077 | 825 | 960  | 22680 | 1.403181818 | 0.995825085 | 0.101855878 |
| 9   | 1.081730769 | 685 | 84   | 17446 | 2.728779979 | 0.999999631 | 0.399996556 |
| 7   | 0.841346154 | 715 | 53   | 18082 | 3.340124027 | 1           | 0.611694991 |
| 17  | 2.043269231 | 409 | 229  | 10425 | 1.892196325 | 0.991331773 | 0.694871645 |
| 77  | 9.254807692 | 825 | 1646 | 22680 | 1.286026731 | 0.997961843 | 0.112323812 |
| 76  | 9.134615385 | 685 | 1507 | 17446 | 1.284415792 | 0.999999889 | 0.413665977 |
| 9   | 1.081730769 | 295 | 88   | 7720  | 2.67642527  | 0.990253115 | 0.439457909 |
| 13  | 1.5625      | 774 | 161  | 20594 | 2.148410291 | 1           | 0.784261838 |
| 11  | 1.322115385 | 753 | 122  | 19662 | 2.354320423 | 0.999959354 | 0.286105938 |
| 35  | 4.206730769 | 715 | 592  | 18082 | 1.49515687  | 1           | 0.626069294 |
| 6   | 0.721153846 | 295 | 41   | 7720  | 3.829681687 | 0.991152123 | 0.408614038 |
| 19  | 2.283653846 | 295 | 278  | 7720  | 1.78856237  | 0.991722345 | 0.380857339 |
| 4   | 0.480769231 | 715 | 15   | 18082 | 6.743869464 | 1           | 0.635679973 |
| 77  | 9.254807692 | 685 | 1533 | 17446 | 1.279245409 | 0.999999997 | 0.428347085 |
| 17  | 2.043269231 | 774 | 241  | 20594 | 1.87685891  | 1           | 0.791404883 |
| 9   | 1.081730769 | 715 | 86   | 18082 | 2.646576679 | 1           | 0.640413219 |

|    |             |     |      |       |             |             |             |
|----|-------------|-----|------|-------|-------------|-------------|-------------|
| 34 | 4.086538462 | 825 | 624  | 22680 | 1.497902098 | 0.998977788 | 0.121834749 |
| 9  | 1.081730769 | 774 | 91   | 20594 | 2.631484794 | 1           | 0.787392809 |
| 18 | 2.163461538 | 774 | 263  | 20594 | 1.8210275   | 1           | 0.771295801 |
| 27 | 3.245192308 | 685 | 434  | 17446 | 1.584452891 | 0.999999993 | 0.443101961 |
| 11 | 1.322115385 | 715 | 121  | 18082 | 2.299046408 | 1           | 0.657886114 |
| 4  | 0.480769231 | 743 | 15   | 18012 | 6.464602961 | 1           | 0.996102543 |
| 63 | 7.572115385 | 295 | 1278 | 7720  | 1.290045357 | 0.996389284 | 0.400259987 |
| 8  | 0.961538462 | 685 | 72   | 17446 | 2.829845904 | 0.999999997 | 0.447246166 |
| 3  | 0.360576923 | 76  | 6    | 1807  | 11.88815789 | 0.823759756 | 0.823759756 |
| 5  | 0.600961538 | 715 | 28   | 18082 | 4.515984016 | 1           | 0.6785604   |
| 13 | 1.5625      | 743 | 152  | 18012 | 2.073351279 | 1           | 0.994508669 |
| 7  | 0.841346154 | 685 | 57   | 17446 | 3.127724421 | 0.999999999 | 0.454620827 |
| 18 | 2.163461538 | 743 | 243  | 18012 | 1.795723045 | 1           | 0.990832867 |
| 53 | 6.370192308 | 715 | 995  | 18082 | 1.347079453 | 1           | 0.681301894 |
| 6  | 0.721153846 | 774 | 44   | 20594 | 3.628259338 | 1           | 0.795323729 |
| 11 | 1.322115385 | 715 | 123  | 18082 | 2.26166354  | 1           | 0.675221219 |
| 11 | 1.322115385 | 685 | 124  | 17446 | 2.259312456 | 0.999999999 | 0.449646179 |
| 10 | 1.201923077 | 295 | 110  | 7720  | 2.379044684 | 0.997605649 | 0.395217817 |
| 7  | 0.841346154 | 715 | 57   | 18082 | 3.105729358 | 1           | 0.677373731 |
| 5  | 0.600961538 | 295 | 30   | 7720  | 4.361581921 | 0.998501038 | 0.393608465 |
| 3  | 0.360576923 | 774 | 7    | 20594 | 11.40310078 | 1           | 0.808411679 |
| 3  | 0.360576923 | 774 | 7    | 20594 | 11.40310078 | 1           | 0.808411679 |
| 3  | 0.360576923 | 774 | 7    | 20594 | 11.40310078 | 1           | 0.808411679 |
| 3  | 0.360576923 | 774 | 7    | 20594 | 11.40310078 | 1           | 0.808411679 |
| 5  | 0.600961538 | 715 | 29   | 18082 | 4.360260429 | 1           | 0.695870538 |
| 6  | 0.721153846 | 715 | 43   | 18082 | 3.528768906 | 1           | 0.693545213 |
| 18 | 2.163461538 | 753 | 267  | 19662 | 1.760329469 | 0.999999725 | 0.385741985 |
| 18 | 2.163461538 | 743 | 248  | 18012 | 1.759518951 | 1           | 0.993048333 |
| 18 | 2.163461538 | 743 | 248  | 18012 | 1.759518951 | 1           | 0.993048333 |
| 4  | 0.480769231 | 774 | 18   | 20594 | 5.91271892  | 1           | 0.819131704 |
| 3  | 0.360576923 | 685 | 7    | 17446 | 10.91511992 | 1           | 0.495977145 |
| 18 | 2.163461538 | 409 | 262  | 10425 | 1.751152504 | 0.999474103 | 0.779107916 |
| 17 | 2.043269231 | 743 | 230  | 18012 | 1.791819299 | 1           | 0.990812423 |
| 4  | 0.480769231 | 753 | 18   | 19662 | 5.802567508 | 0.9999999   | 0.395667541 |
| 7  | 0.841346154 | 715 | 60   | 18082 | 2.95044289  | 1           | 0.740347064 |
| 56 | 6.730769231 | 753 | 1113 | 19662 | 1.31378887  | 0.999999941 | 0.396081106 |
| 9  | 1.081730769 | 825 | 101  | 22680 | 2.449684968 | 0.999970635 | 0.175727208 |
| 6  | 0.721153846 | 774 | 47   | 20594 | 3.396668316 | 1           | 0.8322698   |
| 3  | 0.360576923 | 743 | 7    | 18012 | 10.38954047 | 1           | 0.990039979 |
| 21 | 2.524038462 | 715 | 322  | 18082 | 1.649315901 | 1           | 0.74016956  |
| 24 | 2.884615385 | 825 | 417  | 22680 | 1.582210595 | 0.999974628 | 0.175021255 |
| 9  | 1.081730769 | 743 | 90   | 18012 | 2.42422611  | 1           | 0.987677484 |
| 4  | 0.480769231 | 715 | 18   | 18082 | 5.61989122  | 1           | 0.746844248 |

|    |             |     |      |       |             |             |             |
|----|-------------|-----|------|-------|-------------|-------------|-------------|
| 6  | 0.721153846 | 295 | 47   | 7720  | 3.340786152 | 0.999699802 | 0.439744306 |
| 10 | 1.201923077 | 295 | 116  | 7720  | 2.255990649 | 0.999721118 | 0.420533916 |
| 3  | 0.360576923 | 774 | 8    | 20594 | 9.977713178 | 1           | 0.848629735 |
| 3  | 0.360576923 | 774 | 8    | 20594 | 9.977713178 | 1           | 0.848629735 |
| 3  | 0.360576923 | 774 | 8    | 20594 | 9.977713178 | 1           | 0.848629735 |
| 3  | 0.360576923 | 774 | 8    | 20594 | 9.977713178 | 1           | 0.848629735 |
| 7  | 0.841346154 | 743 | 59   | 18012 | 2.87620047  | 1           | 0.986876044 |
| 27 | 3.245192308 | 825 | 489  | 22680 | 1.517902956 | 0.999990506 | 0.186586623 |
| 4  | 0.480769231 | 753 | 19   | 19662 | 5.497169218 | 0.999999992 | 0.422225423 |
| 8  | 0.961538462 | 743 | 75   | 18012 | 2.585841184 | 1           | 0.983755448 |
| 13 | 1.5625      | 825 | 183  | 22680 | 1.95290611  | 0.999994337 | 0.191001126 |
| 5  | 0.600961538 | 753 | 33   | 19662 | 3.956296028 | 0.999999997 | 0.430222775 |
| 7  | 0.841346154 | 295 | 65   | 7720  | 2.818252934 | 0.999902574 | 0.438574317 |
| 7  | 0.841346154 | 295 | 65   | 7720  | 2.818252934 | 0.999902574 | 0.438574317 |
| 4  | 0.480769231 | 715 | 19   | 18082 | 5.324107471 | 1           | 0.790603784 |
| 3  | 0.360576923 | 715 | 8    | 18082 | 9.483566434 | 1           | 0.786675249 |
| 3  | 0.360576923 | 715 | 8    | 18082 | 9.483566434 | 1           | 0.786675249 |
| 3  | 0.360576923 | 715 | 8    | 18082 | 9.483566434 | 1           | 0.786675249 |
| 3  | 0.360576923 | 715 | 8    | 18082 | 9.483566434 | 1           | 0.786675249 |
| 3  | 0.360576923 | 715 | 8    | 18082 | 9.483566434 | 1           | 0.786675249 |
| 3  | 0.360576923 | 715 | 8    | 18082 | 9.483566434 | 1           | 0.786675249 |
| 3  | 0.360576923 | 715 | 8    | 18082 | 9.483566434 | 1           | 0.786675249 |
| 17 | 2.043269231 | 753 | 257  | 19662 | 1.727223402 | 0.999999999 | 0.441556763 |
| 6  | 0.721153846 | 753 | 49   | 19662 | 3.197333117 | 0.999999999 | 0.434164327 |
| 38 | 4.567307692 | 825 | 753  | 22680 | 1.387323434 | 0.999998286 | 0.204599118 |
| 16 | 1.923076923 | 825 | 249  | 22680 | 1.766484118 | 0.999998397 | 0.202414706 |
| 9  | 1.081730769 | 753 | 101  | 19662 | 2.326772119 | 1           | 0.435489882 |
| 11 | 1.322115385 | 715 | 134  | 18082 | 2.076004592 | 1           | 0.80327483  |
| 6  | 0.721153846 | 715 | 48   | 18082 | 3.161188811 | 1           | 0.801210747 |
| 11 | 1.322115385 | 743 | 129  | 18012 | 2.067169551 | 1           | 0.989424714 |
| 34 | 4.086538462 | 753 | 628  | 19662 | 1.413682848 | 1           | 0.435117137 |
| 8  | 0.961538462 | 715 | 81   | 18082 | 2.497729431 | 1           | 0.801914047 |
| 53 | 6.370192308 | 715 | 1029 | 18082 | 1.302569539 | 1           | 0.800694869 |
| 4  | 0.480769231 | 409 | 20   | 10425 | 5.097799511 | 0.999984443 | 0.842000788 |
| 7  | 0.841346154 | 295 | 67   | 7720  | 2.73412598  | 0.999972829 | 0.461212226 |
| 4  | 0.480769231 | 685 | 20   | 17446 | 5.093722628 | 1           | 0.627768165 |
| 12 | 1.442307692 | 715 | 154  | 18082 | 1.970611207 | 1           | 0.801955881 |
| 11 | 1.322115385 | 825 | 147  | 22680 | 2.057142857 | 0.999999455 | 0.213673278 |
| 4  | 0.480769231 | 774 | 21   | 20594 | 5.068044789 | 1           | 0.897172923 |
| 4  | 0.480769231 | 774 | 21   | 20594 | 5.068044789 | 1           | 0.897172923 |
| 6  | 0.721153846 | 715 | 49   | 18082 | 3.096674754 | 1           | 0.807197288 |
| 15 | 1.802884615 | 715 | 213  | 18082 | 1.780951443 | 1           | 0.804955184 |
| 4  | 0.480769231 | 753 | 21   | 19662 | 4.973629292 | 1           | 0.455739304 |

|    |             |     |     |       |             |             |             |
|----|-------------|-----|-----|-------|-------------|-------------|-------------|
| 23 | 2.764423077 | 825 | 409 | 22680 | 1.545943543 | 0.999999757 | 0.220962409 |
| 6  | 0.721153846 | 774 | 52  | 20594 | 3.070065593 | 1           | 0.901560639 |
| 18 | 2.163461538 | 743 | 263 | 18012 | 1.659166159 | 1           | 0.991615972 |
| 7  | 0.841346154 | 753 | 68  | 19662 | 2.687954066 | 1           | 0.454993903 |
| 7  | 0.841346154 | 715 | 66  | 18082 | 2.682220809 | 1           | 0.815627445 |
| 3  | 0.360576923 | 685 | 9   | 17446 | 8.489537713 | 1           | 0.655688658 |
| 3  | 0.360576923 | 685 | 9   | 17446 | 8.489537713 | 1           | 0.655688658 |
| 6  | 0.721153846 | 715 | 50  | 18082 | 3.034741259 | 1           | 0.817705188 |
| 3  | 0.360576923 | 715 | 9   | 18082 | 8.42983683  | 1           | 0.813981789 |
| 3  | 0.360576923 | 715 | 9   | 18082 | 8.42983683  | 1           | 0.813981789 |
| 6  | 0.721153846 | 295 | 52  | 7720  | 3.019556714 | 0.999993191 | 0.483643697 |
| 4  | 0.480769231 | 715 | 21  | 18082 | 4.817049617 | 1           | 0.819339449 |
| 4  | 0.480769231 | 715 | 21  | 18082 | 4.817049617 | 1           | 0.819339449 |
| 5  | 0.600961538 | 774 | 37  | 20594 | 3.595572317 | 1           | 0.912694736 |
| 4  | 0.480769231 | 753 | 22  | 19662 | 4.747555234 | 1           | 0.480178921 |

FDR

1.42E-22  
4.23E-17  
1.08E-14  
1.39E-14  
1.13E-12  
1.81E-12  
3.54E-11  
1.13E-09  
1.23E-08  
2.31E-08  
6.04E-07  
1.26E-06  
1.99E-06  
2.58E-06  
3.08E-06  
5.70E-06  
7.37E-06  
1.46E-05  
1.82E-05  
1.82E-05  
3.26E-05  
3.24E-05  
2.99E-05  
4.83E-05  
5.03E-05  
7.58E-05  
1.11E-04  
2.38E-04  
2.26E-04  
4.55E-04  
4.55E-04  
4.99E-04  
8.26E-04  
7.95E-04  
0.001160329  
9.28E-04  
0.001256666  
0.001400381  
0.001626003  
0.002177385  
0.001707127  
0.003729511

0.003321296  
0.004872839  
0.004971029  
0.012866323  
0.020675207  
0.044921413  
0.05816409  
0.05570611  
0.091889879  
0.092945279  
0.093273597  
0.078791398  
0.108963622  
0.124643846  
0.140374935  
0.214401197  
0.236556547  
0.199245843  
0.253264463  
0.239426189  
0.284214682  
0.286633801  
0.345173815  
0.298330587  
0.334530956  
0.42289078  
0.359725192  
0.387186453  
0.479982849  
0.389437124  
0.45072612  
0.515727373  
0.596140886  
0.520327134  
0.653781735  
0.698473551  
0.622032993  
0.787415327  
0.857150809  
0.751992476  
0.794443554  
0.859314102  
1.170408008

1.006825507  
1.095152061  
1.236323799  
1.533823017  
1.888137618  
2.145535897  
1.661853414  
1.781744842  
2.494058708  
2.05328144  
1.938040337  
2.72484757  
2.463340198  
2.619774534  
2.49719214  
3.014780742  
2.505033469  
3.380776088  
2.966535129  
3.410509237  
3.550694899  
3.33640755  
3.500671896  
4.553678134  
3.762121969  
5.093651727  
5.115857308  
4.098869091  
3.991257877  
4.904151427  
4.225190334  
5.028913506  
4.302389336  
4.820597243  
4.965952141  
5.60783836  
6.070433069  
5.009144733  
5.073262341  
5.570164025  
6.859577804  
7.094621323  
6.235405715

6.843530656  
6.843530656  
7.469925737  
7.235119736  
6.123589436  
9.82432689  
8.216410667  
10.43205706  
8.256066589  
8.419258769  
8.430839308  
10.02569984  
9.164834643  
12.31852443  
9.704140675  
10.44238925  
12.61018694  
9.924389242  
12.96563942  
13.23350202  
13.18276635  
12.71411489  
11.28147528  
14.59216053  
14.59216053  
13.91402034  
12.15950429  
13.80229648  
14.0911413  
15.31213154  
15.31213154  
15.2261277  
12.90146808  
14.59083266  
12.4794736  
14.31507005  
15.77365463  
17.04603585  
17.04603585  
19.00431091  
19.00431091  
14.9514362  
16.04944435

16.04944435  
16.12186893  
14.90044543  
17.54597671  
15.94334626  
18.07818869  
20.62089466  
19.57563625  
17.71098178  
17.82926898  
17.96728198  
17.59088596  
22.64354701  
19.08225196  
22.8179946  
22.8179946  
20.10027317  
18.26571475  
18.51424151  
23.37007858  
23.37007858  
23.37007858  
24.52687525  
22.09182902  
25.01700451  
25.01700451  
22.27292616  
19.9710465  
23.42663906  
27.03213243  
21.11382853  
22.27081592  
25.06750614  
21.51546246  
26.31145075  
23.98891106  
28.42367913  
21.9118015  
22.18348314  
29.53983344  
26.8286337  
28.21734948  
30.34468824

24.42165244  
29.30266099  
29.4446932  
28.64623433  
32.05794397  
31.23198353  
25.48883598  
29.70777149  
21.56596711  
34.07770845  
33.06678811  
31.02454756  
33.448093  
34.79363421  
32.61526806  
34.83135654  
31.38213697  
27.07309776  
35.49420352  
28.83823718  
35.06318412  
35.06318412  
35.06318412  
35.06318412  
37.46158265  
37.77582788  
33.62518581  
38.06631429  
38.06631429  
37.37944594  
35.88046356  
31.41786508  
39.19133685  
35.41679942  
42.30927771  
36.33223029  
34.58067449  
40.00649393  
41.33452538  
42.8195589  
34.96835685  
42.36737245  
43.95929363

34.58013893  
34.83173885  
43.09543812  
43.09543812  
43.09543812  
43.09543812  
44.28752811  
37.51659051  
39.70943135  
44.89314933  
38.81573616  
41.38100218  
38.32050627  
38.32050627  
48.81486228  
48.94482897  
48.94482897  
48.94482897  
48.94482897  
48.94482897  
48.94482897  
48.94482897  
48.94482897  
43.39058419  
43.53786389  
41.71809102  
41.876896  
44.53768766  
51.25502  
51.5645955  
50.43296792  
45.35324448  
52.17097803  
52.56020456  
42.47722575  
42.30644906  
48.25490405  
53.21711295  
44.37230527  
50.71577702  
50.71577702  
54.3162637  
54.57185558  
48.32168005

46.17136927  
52.76221234  
54.33190455  
49.090102  
56.29457404  
51.81071438  
51.81071438  
57.03647846  
57.09658139  
57.09658139  
46.33583545  
58.21181634  
58.21181634  
55.91913838  
52.54970605
